# Supplementary material
Source: PubMed Central journal article supplement (PMC8492515)
Supplement: NIHMS1718696-supplement-1.pdf [file NIHMS1718696-supplement-1.pdf]

## **Supporting Information**

### **RosettaCM for antibodies with very long HCDR3s and low template availability**

Pranav Kodali<sup>1,2</sup>, Clara T. Schoeder,<sup>1,2</sup> Samuel Schmitz,<sup>1,2</sup> James E. Crowe, Jr.<sup>3,4,5</sup> and Jens Meiler<sup>1,2,6</sup>

<sup>1</sup> Department of Chemistry, Vanderbilt University, Nashville, Tennessee, United States

<sup>2</sup> Center of Structural Biology, Vanderbilt University, Nashville, Tennessee, United States

<sup>3</sup> Vanderbilt Vaccine Center, Vanderbilt University Medical Center, Nashville, Tennessee, United States.

<sup>4</sup> Department of Pathology, Microbiology, and Immunology, Vanderbilt University Medical Center, Nashville, Tennessee, United States.

<sup>5</sup> Departments of Pediatrics, Vanderbilt University Medical Center, Nashville, Tennessee, United States.

<sup>6</sup> Institute for Drug Discovery, University Leipzig Medical School, Leipzig, Germany

## Content

|                                                                                                                                                  |     |
|--------------------------------------------------------------------------------------------------------------------------------------------------|-----|
| Table S1: Antibody Template Structures .....                                                                                                     | S3  |
| Table S2: Antibody Benchmark Set .....                                                                                                           | S31 |
| Figure S1: Comparison of antibody HCDR1 modeling performance for the best models produced by each method to the best multi-template models ..... | S36 |
| Figure S2: Comparison of antibody HCDR2 modeling performance for the best models produced by each method to the best multi-template models ..... | S37 |
| Figure S3: Comparison of antibody LCDR1 modeling performance for the best models produced by each method to the best multi-template models ..... | S38 |
| Figure S4: Comparison of antibody LCDR2 modeling performance for the best models produced by each method to the best multi-template models ..... | S39 |
| Figure S5: Comparison of antibody LCDR3 modeling performance for the best models produced by each method to the best multi-template models ..... | S40 |
| Figure S6: Comparison of antibody HCDR3 modeling performance for the best models produced by AbPredict against RosettaAntibody .....             | S41 |
| Homology Modeling of Human IGM Rheumatoid Factor Fab using RosettaCM .....                                                                       | S42 |
| Figure S7: RosettaCM Template selection .....                                                                                                    | S42 |
| Homology Modeling of Human IGM Rheumatoid Factor Fab using RosettaAntibody .....                                                                 | S50 |
| Homology Modeling of Human IGM Rheumatoid Factor Fab using AbPredict .....                                                                       | S51 |

## Supporting Material

Table S1: Antibody Template Structures

| <b>PDB-ID</b> | <b>Name</b>                                                                                                                                         | <b>Resolution (Å)</b> |
|---------------|-----------------------------------------------------------------------------------------------------------------------------------------------------|-----------------------|
| 1aqk          | Three-Dimensional Structure Of A Human Fab With High Affinity For Tetanus Toxoid                                                                    | 1.84                  |
| 1b2w          | Comparison Of The Three-Dimensional Structures Of A Humanized And A Chimeric Fab Of An Anti-Gamma-Interferon Antibody                               | 2.9                   |
| 1bj1          | Vascular Endothelial Growth Factor In Complex With A Neutralizing Antibody                                                                          | 2.4                   |
| 1bvk          | Humanized Anti-Lysozyme Fv Complexed With Lysozyme                                                                                                  | 2.7                   |
| 1ce1          | 1.9a Structure Of The Therapeutic Antibody Campath-1h Fab In Complex With A Synthetic Peptide Antigen                                               | 1.9                   |
| 1cz8          | Vascular Endothelial Growth Factor In Complex With An Affinity Matured Antibody                                                                     | 2.4                   |
| 1dee          | Structure Of S. Aureus Protein A Bound To A Human Igm Fab                                                                                           | 2.7                   |
| 1dfb          | Structure Of A Human Monoclonal Antibody Fab Fragment Against Gp41 Of Human Immunodeficiency Virus Type I                                           | 2.7                   |
| 1dn0          | Structure Of The Fab Fragment From A Human Igm Cold Agglutinin                                                                                      | 2.28                  |
| 1dql          | Crystal Structure Of An Unliganded (Native) Fv From A Human Igm Anti-Peptide Antibody                                                               | 2.6                   |
| 1fvd          | X-Ray Structures Of The Antigen-Binding Domains From Three Variants Of Humanized Anti-P185-Her2 Antibody 4d5 And Comparison With Molecular Modeling | 2.5                   |
| 1fve          | X-Ray Structures Of The Antigen-Binding Domains From Three Variants Of Humanized Anti-P185-Her2 Antibody 4d5 And Comparison With Molecular Modeling | 2.7                   |
| 1g9m          | Hiv-1 Hxhc2 Gp120 Envelope Glycoprotein Complexed With Cd4 And Induced Neutralizing Antibody 17b                                                    | 2.2                   |
| 1gc1          | Hiv-1 Gp120 Core Complexed With Cd4 And A Neutralizing Human Antibody                                                                               | 2.5                   |
| 1hez          | Antibody-Antigen Complex                                                                                                                            | 2.7                   |
| 1igm          | Three Dimensional Structure Of An Fv From A Human Igm Immunoglobulin                                                                                | 2.3                   |
| 1iqd          | Human Factor VIII C2 Domain Complexed To Human Monoclonal BO2C11 Fab.                                                                               | 2                     |
| 1jps          | Crystal Structure Of Tissue Factor In Complex With Humanized Fab D3h44                                                                              | 1.85                  |

|      |                                                                                                                                |      |
|------|--------------------------------------------------------------------------------------------------------------------------------|------|
| 117i | Crystal Structure Of The Anti-Erb2 Fab2C4                                                                                      | 1.8  |
| 1mhp | Crystal Structure Of A Chimeric Alpha1 Integrin I-Domain In Complex With The Fab Fragment Of A Humanized Neutralizing Antibody | 2.8  |
| 1n0x | Crystal Structure Of A Broadly Neutralizing Anti-HIV-1 Antibody In Complex With A Peptide Mimotope                             | 1.8  |
| 1nfd | An Alpha-Beta T Cell Receptor (Tcr) Heterodimer In Complex With An Anti-Tcr Fab Fragment Derived From A Mitogenic Antibody     | 2.8  |
| 1nl0 | Crystal Structure Of Human Factor IX Gla Domain In Complex Of An Inhibitory Antibody, 10C12                                    | 2.2  |
| 1rhh | Crystal Structure Of The Broadly HIV-1 Neutralizing Fab X5 At 1.90 Angstrom Resolution                                         | 1.9  |
| 1rz7 | Crystal Structure Of Human Anti-Hiv-1 Gp120-Reactive Antibody 48d                                                              | 2    |
| 1s3k | Crystal Structure Of A Humanized Fab (Hu3s193) In Complex With The Lewis Y Tetrasaccharide                                     | 1.9  |
| 1tzh | Crystal Structure Of The Fab YADS1 Complexed With H-VEGF                                                                       | 2.6  |
| 1tzi | Crystal Structure Of The Fab YADS2 Complexed With H-VEGF                                                                       | 2.8  |
| 1u6a | Crystal Structure Of The Broadly Neutralizing Anti-HIV Fab F105                                                                | 2.81 |
| 1vge | Tr1.9 Fab Fragment Of A Human Igg1 Kappa Autoantibody                                                                          | 2    |
| 1w72 | Crystal Structure Of HLA-A1:MAGE-A1 In Complex With Fab-Hyb3                                                                   | 2.15 |
| 1wt5 | The Crystal Structure Of A Humanized Antibody Fv 528                                                                           | 2.1  |
| 1za3 | The Crystal Structure Of The Ysd1 Fab Bound To DR5                                                                             | 3.35 |
| 2a9m | Structural Analysis Of A Tight-Binding Fluorescein-Scfv; Apo Form                                                              | 2.1  |
| 2a9n | A Mutation Designed To Alter Crystal Packing Permits Structural Analysis Of A Tight-Binding Fluorescein-Scfv Complex           | 3    |
| 2agj | Crystal Structure Of A Glycosylated Fab From An Igm Cryoglobulin With Properties Of A Natural Proteolytic Antibody             | 2.6  |
| 2aj3 | Crystal Structure Of A Cross-Reactive HIV-1 Neutralizing CD4-Binding Site Antibody Fab M18                                     | 2.03 |
| 2b1h | Crystal Structure Analysis Of Anti-HIV-1 V3 Fab 2219 In Complex With UG29 Peptide                                              | 2    |
| 2b2x | VLA1 Rdeltah I-Domain Complexed With A Quadruple Mutant Of The AQC2 Fab                                                        | 2.2  |

|      |                                                                                                                                                              |      |
|------|--------------------------------------------------------------------------------------------------------------------------------------------------------------|------|
| 2cmr | Crystal Structure Of The HIV-1 Neutralizing Antibody D5 Fab Bound To The Gp41 Inner-Core Mimetic 5-Helix                                                     | 2    |
| 2d7t | Crystal Structure Of Human Anti Polyhydroxybutyrate Antibody Fv                                                                                              | 1.7  |
| 2eiz | Crystal Structure Of Humanized HYHEL-10 Fv Mutant(HW47Y)-Hen Lysozyme Complex                                                                                | 1.9  |
| 2eks | Crystal Structure Of Humanized Hyhel-10 FV-HEN Lysozyme Complex                                                                                              | 2    |
| 2f5a | Crystal Structure Of Fab' From The Hiv-1 Neutralizing Antibody 2f5                                                                                           | 2.05 |
| 2fb4 | Dir Primaerstruktur Des Kristallisierbaren Monoklonalen Immunoglobulins Igg1 Kol. Ii. Aminosaeuresequenz Der L-Kette, Lambda-Typ, Subgruppe I (German)       | 1.9  |
| 2jff | Structure Of The G6 Fab, A Phage Derived VEGF Binding Fab                                                                                                    | 2.65 |
| 2jfh | Structure Of The B20-4 Fab, A Phage Derived Fab Fragment, In Complex With VEGF                                                                               | 3.1  |
| 2fl5 | Cofactor-Containing Antibodies: Crystal Structure Of The Original Yellow Antibody                                                                            | 3    |
| 2g75 | Crystal Structure Of Anti-SARS M396 Antibody                                                                                                                 | 2.28 |
| 2ghw | Crystal Structure Of SARS Spike Protein Receptor Binding Domain In Complex With A Neutralizing Antibody, 80R                                                 | 2.3  |
| 2h9g | Crystal Structure Of Phage Derived Fab Bdf1 With Human Death Receptor 5 (DR5)                                                                                | 2.32 |
| 2hfg | Crystal Structure Of Hbr3 Bound To CB3s-Fab                                                                                                                  | 2.61 |
| 2hwz | Fab Fragment Of Humanized Anti-Viral Antibody MEDI-493 (Synagis TM)                                                                                          | 1.8  |
| 2j6e | Crystal Structure Of An Autoimmune Complex Between A Human Igm Rheumatoid Factor And Igg1 Fc Reveals A Novel Fc Epitope And Evidence For Affinity Maturation | 3    |
| 2jb5 | Fab Fragment In Complex With Small Molecule Hapten, Crystal Form-1                                                                                           | 2.8  |
| 2ny1 | HIV-1 Gp120 Envelope Glycoprotein (I109C, T257S, S334A, S375W, Q428C) Complexed With CD4 And Antibody 17b                                                    | 1.99 |
| 2nyy | Crystal Structure Of Botulinum Neurotoxin Type A Complexed With Monoclonal Antibody CR1                                                                      | 2.61 |
| 2nz9 | Crystal Structure Of Botulinum Neurotoxin Type A Complexed With Monoclonal Antibody AR2                                                                      | 3.79 |
| 2qqk | Neuropilin-2 A1a2b1b2 Domains In Complex With A Semaphorin-Blocking Fab                                                                                      | 2.75 |
| 2qqn | Neuropilin-1 B1 Domain In Complex With A VEGF-Blocking Fab                                                                                                   | 2.2  |

|      |                                                                                                                                                             |      |
|------|-------------------------------------------------------------------------------------------------------------------------------------------------------------|------|
| 2qr0 | Structure Of VEGF Complexed To A Fab Containing TYR And SER In The Cdrs                                                                                     | 3.5  |
| 2qsc | Crystal Structure Analysis Of Anti-HIV-1 V3-Fab F425-B4e8 In Complex With A V3-Peptide                                                                      | 2.8  |
| 2r0k | Protease Domain Of HGFA With Inhibitor Fab58                                                                                                                | 3.51 |
| 2r0l | Short Form HGFA With Inhibitory Fab75                                                                                                                       | 2.2  |
| 2r56 | Crystal Structure Of A Recombinant Ige Fab Fragment In Complex With Bovine Beta-Lactoglobulin Allergen                                                      | 2.8  |
| 2r8s | High Resolution Structure Of A Specific Synthetic FAB Bound To P4-P6 RNA Ribozyme Domain                                                                    | 1.95 |
| 2uzi | Crystal Structure Of HRAS(G12V) - Anti-RAS Fv Complex                                                                                                       | 2    |
| 2v7n | Unusual Twinning In Crystals Of The Cits Binding Antibody Fab Fragment F3p4                                                                                 | 1.92 |
| 2vxq | Crystal Structure Of The Major Grass Pollen Allergen Phl P 2 In Complex With Its Specific Ige-Fab                                                           | 1.9  |
| 2vxv | Crystal Structure Of Human Igg ABT-325 Fab Fragment                                                                                                         | 1.49 |
| 2wuc | Crystal Structure Of HGFA In Complex With The Allosteric Non- Inhibitory Antibody Fab40.Deltatrp And Ac-KQLR-Chloromethylketone                             | 2.7  |
| 2xra | Crystal Structure Of The HK20 Fab In Complex With A Gp41 Mimetic 5- Helix                                                                                   | 2.3  |
| 2xtj | The Crystal Structure Of PCSK9 In Complex With 1D05 Fab                                                                                                     | 2.7  |
| 2xwt | Crystal Structure Of The Tsh Receptor In Complex With A Blocking Type Tshr Autoantibody                                                                     | 1.9  |
| 2xzc | Crystal Structure Of Phosphonate-Modified Recombinant A.17 Antibody FAB Fragment                                                                            | 1.36 |
| 2yc1 | Crystal Structure Of The Human Derived Single Chain Antibody Fragment (Scfv) 9004G In Complex With Cn2 Toxin From The Scorpion Centruroides Noxius Hoffmann | 1.9  |
| 2yk1 | Structure Of Human Anti-Nicotine Fab Fragment In Complex With Nicotine                                                                                      | 1.85 |
| 2yss | Crystal Structure Of Humanized HYHEL-10 FV Mutant(HQ39KW47Y)-HEN Lysozyme Complex                                                                           | 2.4  |
| 3aaz | Crystal Structure Of The Humanized Recombinant Fab Fragment Of A Murine; Antibody                                                                           | 2.2  |
| 3auv | Predicting Amino Acid Preferences In The Complementarity Determining Regions Of An Antibody-Antigen Recognition Interface                                   | 2.4  |

|      |                                                                                                                                                           |      |
|------|-----------------------------------------------------------------------------------------------------------------------------------------------------------|------|
| 3b2u | Crystal Structure Of Isolated Domain III Of The Extracellular Region Of The Epidermal Growth Factor Receptor In Complex With The Fab Fragment Of IMC-11F8 | 2.58 |
| 3bdy | Dual Specific Bh1 Fab In Complex With VEGF                                                                                                                | 2.6  |
| 3bn9 | Crystal Structure Of MT-SP1 In Complex With Fab Inhibitor E2                                                                                              | 2.17 |
| 3c09 | Crystal Structure The Fab Fragment Of Matuzumab (Fab72000) In Complex With Domain III Of The Extracellular Region Of EGFR                                 | 3.2  |
| 3dvg | Crystal Structure Of K63-Specific Fab Apu.3A8 Bound To K63-Linked Di-Ubiquitin                                                                            | 2.6  |
| 3dvn | Crystal Structure Of K63-Specific Fab Apu2.16 Bound To K63-Linked Di-Ubiquitin                                                                            | 2.7  |
| 3efd | The Crystal Structure Of The Cytoplasmic Domain Of Kcsa                                                                                                   | 2.6  |
| 3eo0 | Structure Of The Transforming Growth Factor-Beta Neutralizing Antibody GC-1008                                                                            | 1.75 |
| 3eo9 | Crystal Structure The Fab Fragment Of Efalizumab                                                                                                          | 1.8  |
| 3eot | Crystal Structure Of LAC031, An Engineered Anti-VLA1 Fab                                                                                                  | 1.9  |
| 3eyf | Crystal Structure Of Anti-Human Cytomegalovirus Antibody 8f9 Plus Gb Peptide                                                                              | 2.3  |
| 3fn0 | Crystal Structure Of HIV-1 Neutralizing Human Fab Z13e1 In Complex With A 12-Residue Peptide Containing The Z13e1 Epitope On Gp41                         | 1.8  |
| 3fzu | Igg1 Fab Characterized By H/D Exchange                                                                                                                    | 2.5  |
| 3g04 | Crystal Structure Of The TSH Receptor In Complex With A Thyroid-Stimulating Autoantibody                                                                  | 2.55 |
| 3g6a | Crystal Structure Of Anti-IL-13 Antibody CNTO607                                                                                                          | 2.1  |
| 3gbn | Crystal Structure Of Fab CR6261 In Complex With The 1918 H1N1 Influenza Virus Hemagglutinin                                                               | 2.2  |
| 3ghe | Crystal Structure Of Anti-HIV-1 Fab 537-10D In Complex With V3 Peptide MN                                                                                 | 2.4  |
| 3giz | Crystal Structure Of The Fab Fragment Of Anti-CD20 Antibody Ofatumumab                                                                                    | 2.2  |
| 3gjf | Rational Development Of High-Affinity T-Cell Receptor-Like Antibodies                                                                                     | 1.9  |
| 3gkw | Crystal Structure Of The Fab Fragment Of Nimotuzumab. An Anti-Epidermal Growth Factor Receptor Antibody                                                   | 2.5  |
| 3go1 | Crystal Structure Of Anti-HIV-1 Fab 268-D In Complex With V3 Peptide MN                                                                                   | 1.89 |
| 3grw | FGFR3 In Complex With A Fab                                                                                                                               | 2.1  |

|      |                                                                                                                            |      |
|------|----------------------------------------------------------------------------------------------------------------------------|------|
| 3h42 | Crystal Structure Of PCSK9 In Complex With Fab From LDLR Competitive Antibody                                              | 2.3  |
| 3hae | Rational Development Of High-Affinity T-Cell Receptor-Like Antibodies                                                      | 2.9  |
| 3hc0 | BHA10 Igg1 Wild-Type Fab - Antibody Directed At Human LTBR                                                                 | 1.9  |
| 3hc3 | BHA10 Igg1 Fab Double Mutant Variant - Antibody Directed At Human LTBR                                                     | 1.72 |
| 3hc4 | BHA10 Igg1 Fab Quadruple Mutant Variant - Antibody Directed At Human LTBR                                                  | 1.62 |
| 3hi6 | Crystal Structure Of Intermediate Affinity I Domain Of Integrin LFA-1 With The Fab Fragment Of Its Antibody AL-57          | 2.3  |
| 3hmx | Crystal Structure Of Ustekinumab FAB/IL-12 Complex                                                                         | 3    |
| 3hr5 | M1prime Peptide From Ige Bound By Humanized Antibody 47H4 Fab                                                              | 2.4  |
| 3i9g | Crystal Structure Of The LT1009 (SONEPCIZUMAB) Antibody Fab Fragment In Complex With Sphingosine-1-Phosphate               | 1.9  |
| 3idg | Crystal Structure Of The HIV-1 Cross Neutralizing Monoclonal Antibody 2F5 In Complex With Gp41 Peptide ALDKWD              | 1.86 |
| 3idx | Crystal Structure Of HIV-Gp120 Core In Complex With CD4-Binding Site Antibody B13, Space Group C222                        | 2.5  |
| 3inu | Crystal Structure Of An Unbound KZ52 Neutralizing Anti-Ebolavirus Antibody.                                                | 2.5  |
| 3juy | Crystal Structure Of A 3B3 Variant, A Broadly Neutralizing HIV-1 Scfv Antibody                                             | 2.5  |
| 3k2u | Crystal Structure Of HGFA In Complex With The Allosteric Inhibitory Antibody Fab40                                         | 2.35 |
| 3kdm | Crystal Structure Of Human Anti-Steroid Fab 5F2 In Complex With Testosterone                                               | 1.5  |
| 3kr3 | Crystal Structure Of IGF-II Antibody Complex                                                                               | 2.2  |
| 3kym | Crystal Structure Of Li33 Igg2 Di-Fab                                                                                      | 2.62 |
| 3l5x | Crystal Structure Of The Complex Between IL-13 And H2L6 FAB                                                                | 1.9  |
| 3l95 | Crystal Structure Of The Human Notch1 Negative Regulatory Region (NRR) Bound To The Fab Fragment Of An Antagonist Antibody | 2.19 |
| 3lh2 | Crystal Structure Of HIV Epitope-Scaffold 4E10_1VI7A_S0_002_N 4E10 Fv Complex                                              | 2.65 |
| 3lmj | Structure Of Human Anti HIV 21c Fab                                                                                        | 2.2  |
| 3lzf | Crystal Structure Of Fab 2D1 In Complex With The 1918 Influenza Virus Hemagglutinin                                        | 2.8  |
| 3m8o | Human Iga1 Fab Fragment                                                                                                    | 1.55 |



|      |                                                                                                                                                        |      |
|------|--------------------------------------------------------------------------------------------------------------------------------------------------------|------|
| 3ma9 | Crystal Structure Of Gp41 Derived Protein Complexed With Fab 8066                                                                                      | 2.05 |
| 3mac | Crystal Structure Of GP41-Derived Protein Complexed With Fab 8062                                                                                      | 2.5  |
| 3mlw | Crystal Structure Of Anti-HIV-1 V3 Fab 1006-15D In Complex With An MN V3 Peptide                                                                       | 2.7  |
| 3mly | Crystal Structure Of Anti-HIV-1 V3 Fab 3074 In Complex With A UR29 V3 Peptide                                                                          | 1.7  |
| 3mme | Structure And Functional Dissection Of PG16, An Antibody With Broad And Potent Neutralization Of HIV-1                                                 | 3.97 |
| 3n85 | Crystallographic Trimer Of HER2 Extracellular Regions In Complex With Tryptophan-Rich Antibody Fragment                                                | 3.2  |
| 3n9g | Crystal Structure Of The Fab Fragment Of The Human Neutralizing Anti-West Nile Virus Mab CR4354                                                        | 1.43 |
| 3na9 | Crystal Structure Of Fab15                                                                                                                             | 1.7  |
| 3naa | Crystal Structure Of Fab15 Mut5                                                                                                                        | 1.7  |
| 3nab | Crystal Structure Of Fab15 Mut6                                                                                                                        | 2.32 |
| 3nac | Crystal Structure Of Fab15 Mut7                                                                                                                        | 1.8  |
| 3nej | Crystal Structure Of Fab15 Mut8                                                                                                                        | 1.6  |
| 3nfs | Crystal Structure The Fab Fragment Of Therapeutic Antibody Daclizumab                                                                                  | 2.6  |
| 3nh7 | Crystal Structure Of The Neutralizing Fab Fragment Abd1556 Bound To The BMP Type I Receptor IA                                                         | 2.7  |
| 3nps | Crystal Structure Of Membrane-Type Serine Protease 1 (MT-SP1) In Complex With The Fab Inhibitor S4                                                     | 1.5  |
| 3oau | Antibody 2G12 Recognizes Di-Mannose Equivalently In Domain- And Non-Domain-Exchanged Forms, But Only Binds The HIV-1 Glycan Shield If Domain-Exchanged | 1.9  |
| 3oaz | A Non-Self Sugar Mimic Of The HIV Glycan Shield Shows Enhanced Antigenicity                                                                            | 1.75 |
| 3p0y | Anti-EGFR/HER3 Fab DL11 In Complex With Domain III Of EGFR Extracellular Region                                                                        | 1.8  |
| 3p30 | Crystal Structure Of The Cluster II Fab 1281 In Complex With HIV-1 Gp41 Ectodomain                                                                     | 3.3  |
| 3pgf | Crystal Structure Of Maltose Bound MBP With A Conformationally Specific Synthetic Antigen Binder (Sab)                                                 | 2.1  |

|      |                                                                                                                                                                 |      |
|------|-----------------------------------------------------------------------------------------------------------------------------------------------------------------|------|
| 3piq | Crystal Structure Of Human 2909 Fab, A Quaternary Structure-Specific Antibody Against HIV-1                                                                     | 3.33 |
| 3pnw | Crystal Structure Of The Tudor Domain Of Human TDRD3 In Complex With An Anti-TDRD3 FAB                                                                          | 2.05 |
| 3pp4 | Epitope Characterization And Crystal Structure Of GA101 Provide Insights Into The Molecular Basis For The Type I / Type II Distinction Of Anti- CD20 Antibodies | 1.6  |
| 3qcu | Crystal Structure Of The LT3015 Antibody Fab Fragment In Complex With Lysophosphatidic Acid (14:0)                                                              | 1.98 |
| 3qeh | Crystal Structure Of Human N12-I15, An ADCC And Non-Neutralizing Anti-HIV-1 Env Antibody                                                                        | 2.59 |
| 3qhf | Crystal Structure Of Fab Del2d1, A Deletion Variant Of Anti-Influenza Antibody 2D1                                                                              | 1.65 |
| 3qot | Crystal Structure Of Human Germline Antibody 1-69/B3                                                                                                            | 1.9  |
| 3qrg | Crystal Structure Of Antirsvf Fab B21m                                                                                                                          | 1.7  |
| 3qwo | Crystal Structure Of A Motavizumab Epitope-Scaffold Bound To Motavizumab Fab                                                                                    | 1.9  |
| 3r1g | Structure Basis Of Allosteric Inhibition Of BACE1 By An Exosite-Binding Antibody                                                                                | 2.8  |
| 3s34 | Structure Of The 1121B Fab Fragment                                                                                                                             | 2.2  |
| 3sdy | Crystal Structure Of Broadly Neutralizing Antibody CR8020 Bound To The Influenza A H3 Hemagglutinin                                                             | 2.85 |
| 3se9 | Crystal Structure Of Broadly And Potently Neutralizing Antibody VRC-PG04 In Complex With HIV-1 Gp120                                                            | 2    |
| 3skj | Structural And Functional Characterization Of An Agonistic Anti-Human Epha2 Monoclonal Antibody                                                                 | 2.5  |
| 3so3 | Structures Of Fab-Protease Complexes Reveal A Highly Specific Non-Canonical Mechanism Of Inhibition.                                                            | 2.1  |
| 3sob | The Structure Of The First YWTD Beta Propeller Domain Of LRP6 In Complex With A FAB                                                                             | 1.9  |
| 3sqo | PCSK9 J16 Fab Complex                                                                                                                                           | 2.7  |
| 3tcl | Crystal Structure Of HIV-1 Neutralizing Antibody CH04                                                                                                           | 1.91 |
| 3tnm | Crystal Structure Of A32 Fab, An ADCC Mediating Anti-HIV-1 Antibody                                                                                             | 1.85 |
| 3u0t | Fab-Antibody Complex                                                                                                                                            | 2.5  |

|      |                                                                                                                                                                               |      |
|------|-------------------------------------------------------------------------------------------------------------------------------------------------------------------------------|------|
| 3u30 | Crystal Structure Of A Linear-Specific Ubiquitin Fab Bound To Linear Ubiquitin                                                                                                | 2.43 |
| 3u4b | Ch04h/Ch02l Fab P4                                                                                                                                                            | 2.89 |
| 3u6r | Three Dimensional Structure Of Broadly Neutralizing Anti - Hepatitis C Virus (HCV) Glycoprotein E2 Single Chain FV Fragment 1:7                                               | 2.67 |
| 3u7y | Structure Of NIH45-46 Fab In Complex With Gp120 Of 93TH057 HIV                                                                                                                | 2.45 |
| 3uc0 | Crystal Structure Of Domain I Of The Envelope Glycoprotein Ectodomain From Dengue Virus Serotype 4 In Complex With The Fab Fragment Of The Chimpanzee Monoclonal Antibody 5H2 | 2.71 |
| 3uji | Crystal Structure Of Anti-HIV-1 V3 Fab 2558 In Complex With MN Peptide                                                                                                        | 1.6  |
| 3ujj | Crystal Structure Of Anti-HIV-1 V3 Fab 4025 In Complex With Con A Peptide                                                                                                     | 2    |
| 3uls | Crystal Structure Of Fab12                                                                                                                                                    | 2.49 |
| 3ux9 | Structural Insights Into A Human Anti-IFN Antibody Exerting Therapeutic Potential For Systemic Lupus Erythematosus                                                            | 2.8  |
| 3w9e | Structure Of Human Monoclonal Antibody E317 Fab Complex With HSV-2 Gd                                                                                                         | 2.3  |
| 3wd5 | Crystal Structure Of Tnfalpha In Complex With Adalimumab Fab Fragment                                                                                                         | 3.1  |
| 3x3f | TRAIL-R2 Extracellular Region Complexed To A Fab Fragment From Human Agonist Antibody KMTR2                                                                                   | 2.1  |
| 3zl4 | Antibody Structural Organization: Role Of Kappa - Lambda Chain Constant Domain Switch In Catalytic Functionality                                                              | 1.95 |
| 3ztn | Structure Of Influenza A Neutralizing Antibody Selected From Cultures Of Single Human Plasma Cells In Complex With Human H1 Influenza Haemagglutinin.                         | 3    |
| 4buh | Human Ige Against The Major Allergen Bet V 1 - Crystal Structure Of Clone M0418 Scfv                                                                                          | 1.3  |
| 4cni | Crystal Structure Of The Fab Portion Of Olokizumab In Complex With IL- 6                                                                                                      | 2.2  |
| 4d9l | Fab Structure Of Anti-HIV-1 Gp120 V2 Mab 697                                                                                                                                  | 2.48 |
| 4d9q | Inhibiting Alternative Pathway Complement Activation By Targeting The Exosite On Factor D                                                                                     | 2.28 |
| 4dgy | Structure Of The Hepatitis C Virus Envelope Glycoprotein E2 Antigenic Region 412-423 Bound To The Broadly Neutralizing Antibody HCV1, C2 Form                                 | 1.8  |
| 4dke | Crystal Structure Of Human Interleukin-34 Bound To Fab1.1                                                                                                                     | 3    |
| 4dkf | Crystal Structure Of Human Interleukin-34 Bound To Fab2                                                                                                                       | 2.61 |
| 4dn3 | Crystal Structure Of Anti-Mcp-1 Antibody Cnto888                                                                                                                              | 2.6  |

|      |                                                                                                                      |      |
|------|----------------------------------------------------------------------------------------------------------------------|------|
| 4edw | Nerve Growth Factor In Complex With Fab From Humanized Version Of Mouse Mab 911 (Tanezumab)                          | 2.48 |
| 4eow | Crystal Structure Of A Disease-Associated Anti-Human GM-CSF Autoantibody MB007                                       | 1.97 |
| 4ers | A Molecular Basis For Negative Regulation Of The Glucagon Receptor                                                   | 2.64 |
| 4evn | Crystal Structure Of Fab CR6261 (Somatic Heavy Chain With Germline-Reverted Light Chain)                             | 2.85 |
| 4f57 | Fab Structure Of A Neutralizing Antibody L1 From An Early Subtype A HIV-1 Infected Patient                           | 1.7  |
| 4f58 | Fab Structure Of A Neutralizing Antibody L3 From An Early Subtype A HIV-1 Infected Patient                           | 2.49 |
| 4fqc | Crystal Structure Of PGT121 Fab Bound To A Complex-Type Sialylated N-Glycan                                          | 2.4  |
| 4fqi | Crystal Structure Of Fab CR9114 In Complex With A H5N1 Influenza Virus Hemagglutinin                                 | 1.71 |
| 4fql | Influenza B Ha Antibody (Fab) Cr8033                                                                                 | 1.9  |
| 4fqq | Crystal Structure Of Germline Antibody PGT121-GL Fab                                                                 | 2.42 |
| 4fze | Crystal Structure Of N26_I1 Fab, An ADCC Mediating Anti-HIV-1 Antibody.                                              | 2    |
| 4g5z | Crystal Structure Of The Therapeutical Antibody Fragment Of Canakinumab In Its Unbound State                         | 1.83 |
| 4g6f | Crystal Structure Of 10E8 Fab In Complex With An HIV-1 Gp41 Peptide                                                  | 2.1  |
| 4g7v | Crystal Structure Of Voltage Sensing Domain Of Ci-VSP With Fragment Antibody (R217E, 2.5 Å)                          | 2.5  |
| 4g80 | Crystal Structure Of Voltage Sensing Domain Of Ci-VSP With Fragment Antibody (WT, 3.8 Å)                             | 3.58 |
| 4gsd | H5.3 Fab Structure                                                                                                   | 2.25 |
| 4gxv | Crystal Structure Of Anti-Influenza Virus Antibody 1F1                                                               | 1.45 |
| 4h8w | Crystal Structure Of Non-Neutralizing And ADCC-Potent Antibody N5-I5 In Complex With HIV-1 Clade A/E Gp120 And Scd4. | 1.85 |
| 4hcr | Crystal Structure Of Human Madcam-1 D1D2 Complexed With Fab PF-547659                                                | 2.3  |
| 4hf5 | Crystal Structure Of Fab 8F8 In Complex A H2N2 Influenza Virus Hemagglutinin                                         | 3    |
| 4hfu | Crystal Structure Of Fab 8M2 In Complex With A H2N2 Influenza Virus Hemagglutinin                                    | 3.11 |

|      |                                                                                                                                  |      |
|------|----------------------------------------------------------------------------------------------------------------------------------|------|
| 4hfw | Anti Rotavirus Antibody                                                                                                          | 2.6  |
| 4hg4 | Crystal Structure Of Fab 2G1 In Complex With A H2N2 Influenza Virus Hemagglutinin                                                | 3.2  |
| 4hha | Anti-Human Cytomegalovirus (HCMV) Fab KE5 With Epitope Peptide AD-2S1                                                            | 1.6  |
| 4hie | Anti-Streptococcus Pneumoniae 23F Fab 023.102                                                                                    | 1.9  |
| 4hk0 | UCA Fab (Unbound) From CH65-CH67 Lineage                                                                                         | 2.5  |
| 4hk3 | I2 Fab (Unbound) From CH65-CH67 Lineage                                                                                          | 3    |
| 4hpo | Crystal Structure Of RV144-Elicited Antibody CH58 In Complex With V2 Peptide                                                     | 1.69 |
| 4hpy | Crystal Structure Of RV144-Elicited Antibody CH59 In Complex With V2 Peptide                                                     | 1.5  |
| 4hs6 | Hepatitis C Envelope Glycoprotein E2 Fragment 412-423 With Humanized And Affinity-Matured Antibody MRCT10.V362                   | 1.53 |
| 4hs8 | Hepatitis C Envelope Glycoprotein E2 Fragment 412-423 With Humanized And Affinity-Matured Antibody Hu5b3.V3                      | 2.6  |
| 4hwe | Crystal Structure Of Ectodomain 3 Of The IL-13 Receptor Alpha1 In Complex With A Human Neutralizing Monoclonal Antibody Fragment | 2.43 |
| 4i18 | Crystal Structure Of Human Prolactin Receptor Complexed With Fab Fragment                                                        | 3.24 |
| 4i77 | Lebrikizumab Fab Bound To IL-13                                                                                                  | 1.9  |
| 4imk | Uncrossed Fab Binding To Human Angiopoietin 2                                                                                    | 2.2  |
| 4iml | Crossfab Binding To Human Angiopoietin 2                                                                                         | 2.93 |
| 4ioi | Meditope-Enabled Trastuzumab In Complex With CQFDLSTRRLKC                                                                        | 1.95 |
| 4irz | Crystal Structure Of A4b7 Headpiece Complexed With Fab Natalizumab                                                               | 2.84 |
| 4j4p | The Complex Of Human Ige-Fc With Two Bound Fab Fragments                                                                         | 2.91 |
| 4j6r | Crystal Structure Of Broadly And Potently Neutralizing Antibody VRC23 In Complex With HIV-1 Gp120                                | 1.64 |
| 4jam | Crystal Structure Of Broadly Neutralizing Anti-Hiv-1 Antibody Ch103                                                              | 1.65 |
| 4jdv | Crystal Structure Of Germ-Line Precursor Of NIH45-46 Fab                                                                         | 1.65 |
| 4jfx | Structure Of Phosphotyrosine (Ptyr) Scaffold Bound To Ptyr Peptide                                                               | 1.95 |
| 4jfz | Structure Of Phosphoserine (Psab) Scaffold Bound To Pser Peptide                                                                 | 1.75 |
| 4jgl | Structure Of Phosphoserine/Threonine (Pstab) Scaffold Bound To Pthr Peptide                                                      | 1.55 |
| 4jha | Crystal Structure Of RSV-Neutralizing Human Antibody D25                                                                         | 1.6  |

|      |                                                                                                                                                 |      |
|------|-------------------------------------------------------------------------------------------------------------------------------------------------|------|
| 4jkp | Restricting HIV-1 Pathways For Escape Using Rationally-Designed Anti-HIV-1 Antibodies                                                           | 2.82 |
| 4jlr | Crystal Structure Of A Designed Respiratory Syncytial Virus Immunogen In Complex With Motavizumab                                               | 2.71 |
| 4jn2 | An Antidote For Dabigatran                                                                                                                      | 1.71 |
| 4jpi | Crystal Structure Of A Putative VRC01 Germline Precursor Fab                                                                                    | 2.1  |
| 4jpk | Crystal Structure Of The Germline-Targeting HIV-1 Gp120 Engineered Outer Domain Eod-GT6 In Complex With A Putative VRC01 Germline Precursor Fab | 2.4  |
| 4jqj | Structure Of Active Beta-Arrestin1 Bound To A G Protein-Coupled Receptor Phosphopeptide                                                         | 2.6  |
| 4jy5 | Crystal Structure Of Human Fab PGT122, A Broadly Reactive And Potent HIV-1 Neutralizing Antibody                                                | 1.75 |
| 4jzj | Crystal Structure Of Receptor-Fab Complex                                                                                                       | 2.8  |
| 4jzn | Three Dimensional Structure Of Broadly Neutralizing Human Anti - Hepatitis C Virus (HCV) Glycoprotein E2 Fab Fragment HC84-1                    | 2.05 |
| 4jzo | Three Dimensional Structure Of Broadly Neutralizing Human Anti - Hepatitis C Virus (HCV) Glycoprotein E2 Fab Fragment HC84-27                   | 2.22 |
| 4k3j | Crystal Structure Of Onartuzumab Fab In Complex With MET And HGF-Beta                                                                           | 2.8  |
| 4k94 | Crystal Structure Of KIT D4D5 Fragment In Complex With Anti-Kit Antibody Fab19                                                                  | 2.4  |
| 4k9e | Crystal Structure Of KIT D4D5 Fragment In Complex With Anti-Kit Antibodies Fab79D                                                               | 2.7  |
| 4kmt | Crystal Structure Of Human Germline Antibody 5-51/O12                                                                                           | 2.1  |
| 4kq3 | Crystal Structure Of Anti-IL-17A Antibody CNTO3186                                                                                              | 1.92 |
| 4ky1 | Humanized HP1/2 Fab                                                                                                                             | 2.97 |
| 4leo | Crystal Structure Of Anti-HER3 Fab RG7116 In Complex With The Extracellular Domains Of Human Her3 (ERBB3)                                       | 2.64 |
| 4lex | Unliganded Crystal Structure Of Mab7                                                                                                            | 2.02 |
| 4lf3 | Inhibitory Mechanism Of An Allosteric Antibody Targeting The Glucagon Receptor                                                                  | 2.73 |
| 4liq | Structure Of The Extracellular Domain Of Human CSF-1 Receptor In Complex With The Fab Fragment Of RG7155                                        | 2.6  |
| 4lkc | An Antibody Against The C-Terminal Domain Of PCSK9 Lowers LDL Cholesterol Levels In Vivo                                                        | 2.2  |

|      |                                                                                                                                |      |
|------|--------------------------------------------------------------------------------------------------------------------------------|------|
| 4lkx | Humanized Antibody 4B12 Fab Complexed With A Cemx Segment                                                                      | 1.92 |
| 4llu | Structure Of Pertuzumab Fab With Light Chain Clambda At 2.16A                                                                  | 2.16 |
| 4lly | Crystal Structure Of Pertuzumab Clambda Fab With Variable And Constant Domain Redesigns (VRD2 And CRD2) At 1.6A                | 1.6  |
| 4lmq | Development And Preclinical Characterization Of A Humanized Antibody Targeting CXCL12                                          | 2.77 |
| 4lss | Crystal Structure Of Broadly And Potently Neutralizing Antibody VRC01 In Complex With HIV-1 Clade A Strain KER_2018_11 Gp120   | 2.59 |
| 4lst | Crystal Structure Of Broadly And Potently Neutralizing Antibody VRC01 In Complex With HIV-1 Clade C Strain ZM176.66 Gp120      | 2.55 |
| 4lsu | Crystal Structure Of Broadly And Potently Neutralizing Antibody VRC-PG20 In Complex With HIV-1 Clade A/E 93TH057 Gp120         | 2.3  |
| 4m1d | Crystal Structure Of Anti-HIV-1 Fab 447-52D In Complex With V3 Cyclic Peptide MN                                               | 1.8  |
| 4m5y | Crystal Structure Of Broadly Neutralizing Fab 5J8                                                                              | 1.55 |
| 4m62 | Ontogeny Of Recognition Specificity And Functionality For The Anti-HIV Neutralizing Antibody 4E10                              | 1.8  |
| 4m6n | Crystal Structure Of Anti-IL-23 Antibody CNTO1959 At Ph 6.5                                                                    | 2    |
| 4m6o | Crystal Structure Of Anti-NGF Antibody CNTO7309                                                                                | 2.8  |
| 4mwf | Structure Of Hepatitis C Virus Envelope Glycoprotein E2 Core Bound To Broadly Neutralizing Antibody AR3C                       | 2.64 |
| 4mxv | Structure Of Lymphotoxin Alpha Bound To Anti-Lta Fab                                                                           | 3.2  |
| 4n0y | Structure Of The Hepatitis C Envelope Glycoprotein E1 Antigenic Region 314-324 Bound To The Cross-Neutralizing Antibody IGH526 | 1.75 |
| 4n9g | Crystal Structure Of A Computationally Designed RSV-Presenting Epitope Scaffold And Its Elicited Antibody 17HD9                | 2.5  |
| 4nik | Structure Of Human Gankyrin In Complex To The Single Chain Antibody F5                                                         | 2.5  |
| 4nki | Crystal Structure Of A Fab                                                                                                     | 2.41 |
| 4nm4 | Crystal Structure Of Broadly Neutralizing Antibody CR8043                                                                      | 2.65 |
| 4nnp | Crystal Structure Of Apo Manganese ABC Transporter Mntc From Staphylococcus Aureus Bound To An Antagonistic Fab Fragment       | 2.69 |
| 4np4 | Clostridium Difficile Toxin B CROP Domain In Complex With FAB Domains Of Neutralizing Antibody Bezlotoxumab                    | 2.89 |

|      |                                                                                                                               |      |
|------|-------------------------------------------------------------------------------------------------------------------------------|------|
| 4npy | Crystal Structure Of Germline Fab PGT121, A Putative Precursor Of The Broadly Reactive And Potent HIV-1 Neutralizing Antibody | 1.8  |
| 4nrx | Crystal Structure Of HIV-1 Neutralizing Antibody M66 In Complex With Gp41 MPER Peptide                                        | 2.21 |
| 4nrz | Crystal Structure Of HIV-1 Neutralizing Antibody M66.6                                                                        | 2.42 |
| 4nug | Crystal Structure Of HIV-1 Broadly Neutralizing Antibody PGT151                                                               | 1.86 |
| 4nwt | Crystal Structure Of The Anti-Human NGF Fab APE1531                                                                           | 1.75 |
| 4nyl | Crystal Structure Of Adalimumab FAB Fragment                                                                                  | 2.8  |
| 4nzu | Crystal Structure Of The Primary Monoclonal Antibody 13PL Fab' From A Multiple Myeloma Patient                                | 1.2  |
| 4o5l | Crystal Structure Of Broadly Neutralizing Antibody F045-092                                                                   | 1.5  |
| 4oaw | Fab Structure Of Anti-HIV Gp120 V2 Mab 2158                                                                                   | 2.8  |
| 4od2 | Crystal Structure Of The Fab Fragment Of An Anti-DR5 Antibody Bound To DR5                                                    | 3.2  |
| 4odx | 4E10 Germline Encoded Precursor No.7 In Complex With Epitope Scaffold T117                                                    | 3.1  |
| 4ogy | Crystal Structure Of Fab DX-2930 In Complex With Human Plasma Kallikrein At 2.1 Angstrom Resolution                           | 2.1  |
| 4ojf | Humanised 3D6 Fab Complexed To Amyloid Beta 1-8                                                                               | 2    |
| 4olu | Crystal Structure Of Antibody VRC07 In Complex With Clade A/E 93TH057 HIV-1 Gp120 Core                                        | 2.2  |
| 4olv | Crystal Structure Of Antibody VRC07-G54F In Complex With Clade A/E 93TH057 HIV-1 Gp120 Core                                   | 2.5  |
| 4olw | Crystal Structure Of Antibody VRC07-G54H In Complex With Clade A/E 93TH057 HIV-1 Gp120 Core                                   | 2.71 |
| 4olx | Crystal Structure Of Antibody VRC07-G54L In Complex With Clade A/E 93TH057 HIV-1 Gp120 Core                                   | 2.2  |
| 4olz | Crystal Structure Of Antibody VRC07-G54W In Complex With Clade A/E 93TH057 HIV-1 Gp120 Core                                   | 2.1  |
| 4om0 | Crystal Structure Of Antibody VRC07-G54Y In Complex With Clade A/E 93TH057 HIV-1 Gp120 Core                                   | 2.29 |
| 4om1 | Crystal Structure Of Antibody VRC07-I30Q, G54W, S58N In Complex With Clade A/E 93TH057 HIV-1 Gp120 Core                       | 2.13 |
| 4oqt | LINGO-1/Li81 Fab Complex                                                                                                      | 3.23 |



|      |                                                                                                                                                                                                          |      |
|------|----------------------------------------------------------------------------------------------------------------------------------------------------------------------------------------------------------|------|
| 4ot1 | Structural Basis For The Recognition Of Human Cytomegalovirus Glycoprotein B By The Neutralizing Human Antibody SM5-1                                                                                    | 2.11 |
| 4p59 | HER3 Extracellular Domain In Complex With Fab Fragment Of MOR09825                                                                                                                                       | 3.4  |
| 4ps4 | Crystal Structure Of The Complex Between IL-13 And M1295 FAB                                                                                                                                             | 2.8  |
| 4ptu | Crystal Structure Of Anti-23F Strep Fab C05 With Rhamnose                                                                                                                                                | 1.51 |
| 4py7 | Crystal Structure Of Fab 3.1                                                                                                                                                                             | 2.7  |
| 4q2z | Fab Fragment Of HIV Vaccine-Elicited CD4bs-Directed Antibody, GE356, From A Non-Human Primate                                                                                                            | 1.93 |
| 4qci | PDGF-B Blocking Antibody Bound To PDGF-BB                                                                                                                                                                | 2.3  |
| 4qf1 | Crystal Structure Of Unliganded CH59UA, The Inferred Unmutated Ancestor Of The RV144 Anti-HIV Antibody Lineage Producing CH59                                                                            | 2.4  |
| 4qhl | I3.2 (Unbound) From CH103 Lineage                                                                                                                                                                        | 3.15 |
| 4qhm | I3.1 (Unbound) From CH103 Lineage                                                                                                                                                                        | 3.23 |
| 4qhu | Crystal Structure Of IL-17A/Fab6785 Complex                                                                                                                                                              | 2.2  |
| 4qxg | Antigen Binding Fragment Of An Anti IFNAR1 Antibody                                                                                                                                                      | 2.3  |
| 4r7d | Fab Hu 15c1                                                                                                                                                                                              | 2.75 |
| 4r8w | Crystal Structure Of H7 Hemagglutinin From A/Anhui/1/2013 In Complex With A Neutralizing Antibody CT149                                                                                                  | 2.8  |
| 4r96 | Structure Of A Llama Glama Fab 48A2 Against Human Cmet                                                                                                                                                   | 3.31 |
| 4rav | Crystal Structure Of Scfvc4 In Complex With The First 17 AA Of Huntingtin                                                                                                                                | 2.5  |
| 4ris | Structural Analysis Of The Unmutated Ancestor Of The HIV-1 Envelope V2 Region Antibody CH58 Isolated From An RV144 HIV-1 Vaccine Efficacy Trial Vaccinee And Associated With Decreased Transmission Risk | 2.3  |
| 4rrp | Crystal Structure Of The Fab Complexed With Antigen Asf1p, Northeast Structural Genomics Consortium (NESG) Target Pdr16                                                                                  | 2.79 |
| 4rx4 | Crystal Structure Of VH1-46 Germline-Derived CD4-Binding Site-Directed Antibody 8ANC134 In Complex With HIV-1 Clade A Q842.D12 Gp120                                                                     | 3.45 |
| 4s1r | Crystal Structure Of A VRC01-Lineage Antibody, 45-VRC01.H08.F-117225, In Complex With Clade A/E HIV-1 Gp120 Core                                                                                         | 3.21 |
| 4s1s | Crystal Structure Of A VRC01-Lineage Antibody, 45-VRC01.H5.F-185917, In Complex With Clade A/E HIV-1 Gp120 Core                                                                                          | 3.39 |
| 4tsa | Structure Of A Lysozyme Fab Complex                                                                                                                                                                      | 2.27 |
| 4tsb | Structure Of A Lysozyme Antibody Complex                                                                                                                                                                 | 1.95 |

|      |                                                                                                                                                       |      |
|------|-------------------------------------------------------------------------------------------------------------------------------------------------------|------|
| 4tsc | Structure Of A Lysozyme Antibody Complex                                                                                                              | 1.92 |
| 4ttt | Structure Of A Lysozyme Antibody Complex                                                                                                              | 2.15 |
| 4u6v | Mechanisms Of Neutralization Of A Human Anti-Alpha Toxin Antibody                                                                                     | 2.56 |
| 4ud3 | Structure Of A Redesigned Cross-Reactive Antibody To Dengue Virus With Increased In Vivo Potency                                                      | 2.49 |
| 4ut7 | Crystal Structure Of The Scfv Fragment Of The Broadly Neutralizing Human Antibody Ede2 A11                                                            | 1.7  |
| 4ut9 | Crystal Structure Of Dengue 2 Virus Envelope Glycoprotein Dimer In Complex With The Scfv Fragment Of The Broadly Neutralizing Human Antibody EDE1 C10 | 3.2  |
| 4uta | Crystal Structure Of Dengue 2 Virus Envelope Glycoprotein In Complex With The Fab Fragment Of The Broadly Neutralizing Human Antibody EDE1 C8         | 3    |
| 4uu9 | Crystal Structure Of The Human C5a In Complex With MEDI7814 A Neutralising Antibody                                                                   | 2.12 |
| 4uv4 | Crystal Structure Of Anti-FPR Fpro0165 Fab Fragment                                                                                                   | 3.08 |
| 4uv7 | The Complex Structure Of Extracellular Domain Of EGFR And GC1118A                                                                                     | 2.1  |
| 4v1d | Ternary Complex Among Two Human Derived Single Chain Antibody Fragments And Cn2 Toxin From Scorpion Centruroides Noxius.                              | 3.1  |
| 4wuk | Crystal Structure Of Apo CH65 Fab                                                                                                                     | 1.7  |
| 4wuu | Structure Of ESK1 In Complex With HLA-A*0201/WT1                                                                                                      | 3.05 |
| 4x4x | Retrofitting Antibodies With Stabilizing Mutations. Herceptin Scfv Mutant.                                                                            | 2.25 |
| 4x4y | Retrofitting Antibodies With Stabilizing Mutations. Herceptin Scfv Mutant K30D/S52D.                                                                  | 2.49 |
| 4x7s | Structure Of Omalizumab Fab Fragment Crystal Form 1                                                                                                   | 1.9  |
| 4xak | Crystal Structure Of Potent Neutralizing Antibody M336 In Complex With MERS Co-V RBD                                                                  | 2.45 |
| 4xc1 | Crystal Structure Of Human 4E10 Fab In Complex With Its Peptide Epitope On HIV-1 GP41: Crystals Cryoprotected With Sn-Glycerol 3-Phosphate            | 1.63 |
| 4xgz | Crystal Structure Of Human Paxillin LD2 Motif In Complex With Fab Fragment                                                                            | 2.5  |
| 4xml | Crystal Structure Of Fab Of HIV-1 Gp120 V3-Specific Human Monoclonal Antibody 2424                                                                    | 2.68 |
| 4xnq | Antibody Hemagglutinin Complexes                                                                                                                      | 2    |
| 4xtr | Structure Of Get3 Bound To The Transmembrane Domain Of Pep12                                                                                          | 2.05 |

|      |                                                                                                                                                                                 |      |
|------|---------------------------------------------------------------------------------------------------------------------------------------------------------------------------------|------|
| 4xvj | Structure Of The Hepatitis C Virus Envelope Glycoprotein E2 Antigenic 2 Region 412-423 Bound To The Broadly Neutralizing Antibody Hc33.1                                        | 2    |
| 4xvt | Crystal Structure Of HIV-1 93TH057 Coree Gp120 With Antibody 45-VRC01.H01+07.O-863513/45-VRC01.L01+07.O-110653 (VRC07_1995)                                                     | 1.69 |
| 4xx1 | Low Resolution Structure Of LCAT In Complex With Fab1                                                                                                                           | 3.6  |
| 4xxd | Crystal Structure Of Mid-Region Amyloid Beta Capture By Solanezumab                                                                                                             | 2.41 |
| 4y5v | Diabody 305 Complex With Epor                                                                                                                                                   | 2.6  |
| 4y5x | Diabody 305 Complex With Epor                                                                                                                                                   | 3.15 |
| 4ydi | Crystal Structure Of Broad And Potently Neutralizing VRC01-Class Antibody Z258-VRC27.01, Isolated From Human Donor Z258, In Complex With HIV-1 Gp120 From Clade A Strain Q23.17 | 3.45 |
| 4ydk | Crystal Structure Of Broadly And Potently Neutralizing Antibody C38-VRC16.01 In Complex With HIV-1 Clade AE Strain 93TH057 Gp120                                                | 2.05 |
| 4ydl | Crystal Structure Of Broadly And Potently Neutralizing Antibody C38-VRC18.02 In Complex With HIV-1 Clade AE Strain 93TH057gp120                                                 | 1.8  |
| 4ygv | Reversal Agent For Dabigatran                                                                                                                                                   | 1.76 |
| 4yhl | Reversal Agent For Dabigatran                                                                                                                                                   | 2.09 |
| 4yho | Reversal Agent For Dabigatran                                                                                                                                                   | 1.82 |
| 4yhy | Crystal Structure Of 309M3-B In Complex With Trimethylated Lys                                                                                                                  | 1.9  |
| 4yhz | Crystal Structure Of 304M3-B Fab In Complex With H3k4me3 Peptide                                                                                                                | 2.3  |
| 4yjz | Human Antibody H2526 In Complex With Influenza Hemagglutinin H1 Solomon Islands/03/2006                                                                                         | 2.72 |
| 4yk4 | Human Antibody 641 I-9 In Complex With Influenza Hemagglutinin H1 Solomon Islands/03/2006                                                                                       | 2.8  |
| 4ypg | Structural Insights Into The Neutralization Properties Of A Human Anti-Interferon Monoclonal Antibody                                                                           | 3    |
| 4ywg | Crystal Structure Of 830A In Complex With V1V2                                                                                                                                  | 3    |
| 4z0x | Structure Of Hepatitis C Virus Envelope Glycoprotein E2 Antigenic Region 434-446 Bound To The Broadly Neutralizing Antibody HC26AM                                              | 2    |
| 4z5r | Rontalizumab Fab Bound To Interferon-A2                                                                                                                                         | 3    |
| 4zd3 | Structure Of A Transglutaminase 2-Specific Autoantibody Fab Fragment                                                                                                            | 2.4  |
| 4zfg | Dual-Specificity Fab 5A12 In Complex With Angiopoietin 2                                                                                                                        | 2.27 |
| 4zs6 | Receptor Binding Domain And Fab Complex                                                                                                                                         | 3.17 |

|      |                                                                                                                        |      |
|------|------------------------------------------------------------------------------------------------------------------------|------|
| 4zyk | Crystal Structure Of Quaternary-Specific RSV-Neutralizing Human Antibody AM14                                          | 2    |
| 5aam | Structure Of A Redesigned Cross-Reactive Antibody To Dengue Virus With Increased In Vivo Potency                       | 2.49 |
| 5alb | Ticagrelor Antidote Candidate MEDI2452 In Complex With Ticagrelor                                                      | 2.16 |
| 5anm | Crystal Structure Of Ige Fc In Complex With A Neutralizing Antibody                                                    | 2.85 |
| 5awn | Crystal Structure Of Human Anti-HIV-1 Broadly Neutralizing Antibody 3BC176 Fab                                         | 1.89 |
| 5b71 | Crystal Structure Of Complement C5 In Complex With SKY59                                                               | 2.11 |
| 5bjz | Crystal Structure Of Maltose Binding Protein In Complex With An Allosteric Synthetic Antibody                          | 1.95 |
| 5bk1 | Crystal Structure Of Maltose Binding Protein In Complex With An Endosteric Synthetic Antibody                          | 2.15 |
| 5bk2 | Crystal Structure Of Maltose Binding Protein In Complex With A Peristeric Synthetic Antibody                           | 2.6  |
| 5bk3 | Crystal Structure Of The Neutralizing Anti-Circumsporozoite Protein 580 Antibody                                       | 2.8  |
| 5bk5 | Crystal Structure Of The Anti-Circumsporozoite Protein 663 Germline Antibody                                           | 3    |
| 5bo1 | Crystal Structure Of A Human Jag1 Fragment In Complex With An Anti-Jag1 Fab                                            | 2.56 |
| 5bv7 | Crystal Structure Of Human LCAT (L4F, N5D) In Complex With Fab Of An Agonistic Antibody                                | 2.45 |
| 5bvj | The Molecular Mode Of Action And Species Specificity Of Canakinumab, A Human Monoclonal Antibody Neutralizing IL-1beta | 2    |
| 5bzd | Crystal Structure Of PCDN-27A, An Antibody From The PCDN Family Of HIV-1 Antibodies                                    | 2.7  |
| 5bzw | Crystal Structure Of PCDN-27B, An Antibody From The PCDN Family Of HIV-1 Antibodies                                    | 2.9  |
| 5c2b | Anti-CXCL13 Parental Scfv - 3B4                                                                                        | 1.4  |
| 5c6w | Anti-CXCL13 Scfv - E10                                                                                                 | 1.54 |
| 5c8j | A Yidc-Like Protein In The Archaeal Plasma Membrane                                                                    | 3.5  |
| 5cek | Crystal Structure Of Human Anti-HIV-1 Broadly Neutralizing Antibody 3BC315 Fab                                         | 1.95 |
| 5cd3 | Structure Of Immature VRC01-Class Antibody DRVIA7                                                                      | 2.9  |

|      |                                                                                                                                   |      |
|------|-----------------------------------------------------------------------------------------------------------------------------------|------|
| 5cex | Crystal Structure Of Fab 32H+109L, A Putative Precursor Of The PGT121 Family Of Potent HIV-1 Antibodies                           | 2.11 |
| 5cgy | Fab Fragment Of Chikungunya Virus Neutralizing Human Monoclonal Antibody 4J21                                                     | 2.07 |
| 5chn | Fab Fragments Of Chikungunya Virus Neutralizing Human Monoclonal Antibody 5M16                                                    | 2.05 |
| 5cil | Crystal Structure Of Non-Neutralizing Version Of 4E10 (WDWD) With Epitope Bound                                                   | 1.81 |
| 5cin | Crystal Structure Of Non-Neutralizing Version Of 4E10 (Deltaloop) With Epitope Bound                                              | 1.7  |
| 5cus | Crystal Structure Of Serbb3-Fab3379 Complex                                                                                       | 3.2  |
| 5czv | Crystal Structure Of Notch3 NRR In Complex With 20350 Fab                                                                         | 3.19 |
| 5czx | Crystal Structure Of Notch3 NRR In Complex With 20358 Fab                                                                         | 2.1  |
| 5d1z | Isdb NEAT1 Bound By Clone D4-10                                                                                                   | 3.17 |
| 5d6c | Structure Of 4497 Fab Bound To Synthetic Wall Teichoic Acid Fragment                                                              | 1.72 |
| 5d72 | Crystal Structure Of MOR04252, A Neutralizing Anti-Human GM-CSF Antibody Fab Fragment In Complex With Human GM-CSF                | 2.6  |
| 5d7s | Crystal Structure Of MOR04357, A Neutralizing Anti-Human GM-CSF Antibody Fab Fragment                                             | 1.88 |
| 5d9q | Crystal Structure Of The BG505 SOSIP Gp140 HIV-1 Env Trimer In Complex With The Broadly Neutralizing Fab PGT122 And Scfv NIH45-46 | 4.4  |
| 5dd0 | Crystal Structures In An Anti-HIV Antibody Lineage From Immunization Of Rhesus Macaques                                           | 2.49 |
| 5dd5 | Crystal Structures In An Anti-HIV Antibody Lineage From Immunization Of Rhesus Macaques                                           | 1.9  |
| 5dr5 | Crystal Structure Of The Sclerostin-Neutralizing Fab Abd09097                                                                     | 1.85 |
| 5drw | Crystal Structure Of The BCR Fab Fragment From Subset #4 Case CLL183                                                              | 2.27 |
| 5drz | Crystal Structure Of Anti-HIV-1 Antibody F240 Fab In Complex With Gp41 Peptide                                                    | 2.54 |
| 5dum | Crystal Structure Of Influenza A Virus H5 Hemagglutinin Globular Head In Complex With The Fab Of Antibody 65C6                    | 3    |
| 5dur | Influenza A Virus H5 Hemagglutinin Globular Head In Complex With Antibody 100F4                                                   | 2.82 |
| 5e8e | Crystal Structure Of Thrombin Bound To An Exosite 1-Specific Iga Fab                                                              | 1.9  |

|      |                                                                                                                                                                                                        |      |
|------|--------------------------------------------------------------------------------------------------------------------------------------------------------------------------------------------------------|------|
| 5ea0 | Structure Of The Antibody 7968 With Human Complement Factor H-Derived Peptide                                                                                                                          | 2    |
| 5eii | Structural Determination Of An Protein Complex Of A Fab With Increased Solubility                                                                                                                      | 2.44 |
| 5esv | Crystal Structure Of Broadly Neutralizing Antibody CH03, Isolated From Donor CH0219, In Complex With Scaffolded Trimeric HIV-1 Env V1V2 Domain From The Clade C Superinfecting Strain Of Donor CAP256. | 3.11 |
| 5eu7 | Crystal Structure Of HIV-1 Integrase Catalytic Core In Complex With Fab                                                                                                                                | 2.64 |
| 5f3h | Structure Of Myostatin In Complex With Humanized RK35 Antibody                                                                                                                                         | 2.7  |
| 5f6h | Crystal Structure Of Tier 2 Neutralizing Antibody DH427 From A Rhesus Macaque                                                                                                                          | 2.66 |
| 5f6i | Crystal Structure Of Tier 2 Neutralizing Antibody DH428 From A Rhesus Macaque                                                                                                                          | 2.32 |
| 5f72 | De Novo Design And Crystallographic Validation Of Antibodies Targeting A Pre-Selected Epitope                                                                                                          | 1.85 |
| 5f96 | Crystal Structure Of Broadly Neutralizing VH1-46 Germline-Derived CD4-Binding Site-Directed Antibody CH235.12 In Complex With HIV-1 Clade A/E 93TH057 Gp120                                            | 2.24 |
| 5f9o | Crystal Structure Of Broadly Neutralizing VH1-46 Germline-Derived CD4-Binding Site-Directed Antibody CH235.09 In Complex With HIV-1 Clade A/E 93TH057 Gp120                                            | 1.86 |
| 5f9w | Crystal Structure Of Broadly Neutralizing VH1-46 Germline-Derived CD4-Binding Site-Directed Antibody CH235 In Complex With HIV-1 Clade A/E 93TH057 Gp120                                               | 2.89 |
| 5fcu | Crystal Structure Of The Inner Domain Of Clade A/E Hiv-1 Gp120 In Complex With The Adcc-Potent Rhesus Macaque Antibody Jr4                                                                             | 1.85 |
| 5feh | Crystal Structure Of PCT64_35B, A Broadly Neutralizing Anti-HIV Antibody                                                                                                                               | 3.1  |
| 5fha | Crystal Structure Of Protective Ebola Virus Antibody 114                                                                                                                                               | 1.97 |
| 5fhb | Crystal Structure Of Protective Ebola Virus Antibody 100                                                                                                                                               | 1.97 |
| 5fuz | Extending The Half-Life Of A Fab Fragment Through Generation Of A Humanised Anti-Human Serum Albumin (HSA) Fv Domain: An Investigation Into The Correlation Between Affinity And Serum Half-Life       | 2.68 |
| 5g64 | The Complex Between Human Ige-Fc And Two Anti-Ige Fab Fragments                                                                                                                                        | 3.71 |
| 5ggq | Crystal Structure Of Nivolumab Fab Fragment                                                                                                                                                            | 1.9  |
| 5ggs | PD-1 In Complex With Pembrolizumab Fab                                                                                                                                                                 | 2    |

|      |                                                                                                                                      |      |
|------|--------------------------------------------------------------------------------------------------------------------------------------|------|
| 5ggt | PD-L1 In Complex With BMS-936559 Fab                                                                                                 | 2.8  |
| 5ggv | CTLA-4 In Complex With Tremelimumab Fab                                                                                              | 2    |
| 5gks | Crystal Structure Of SLE Patient-Derived Anti-DNA Antibody                                                                           | 2.05 |
| 5gmq | Structure Of MERS-Cov RBD In Complex With A Fully Human Antibody MCA1                                                                | 2.7  |
| 5gru | Structure Of Mono-Specific Diabody                                                                                                   | 1.96 |
| 5grv | Crystal Structure Of Homo-Specific Diabody                                                                                           | 2.3  |
| 5grw | Crystal Structure Of Homo-Specific Diabody                                                                                           | 2.8  |
| 5grx | Crystal Structure Of Disulfide-Bonded Diabody                                                                                        | 2    |
| 5gry | Crystal Structure Of Disulfide-Bonded Diabody                                                                                        | 1.64 |
| 5grz | Crystal Structure Of Disulfide-Bonded Diabody                                                                                        | 2.7  |
| 5gs1 | Crystal Structure Of Homo-Specific Diabody                                                                                           | 2    |
| 5gzo | Structure Of Neutralizing Antibody Bound To Zika Envelope Protein                                                                    | 2.76 |
| 5hi4 | Binding Site Elucidation And Structure Guided Design Of Macrocyclic IL-17A Antagonists                                               | 1.8  |
| 5i15 | Crystal Structure Of Human Germline Antibody Ighv1-69/Igkv1-39                                                                       | 2.6  |
| 5i16 | Crystal Structure Of Human Germline Antibody Ighv1-69/Igkv3-11                                                                       | 1.9  |
| 5i17 | Crystal Structure Of Human Germline Antibody Ighv1-69/Igkv3-20                                                                       | 3.3  |
| 5i19 | Crystal Structure Of Human Germline Antibody Ighv3-23/Igkv1-39                                                                       | 2.8  |
| 5i1a | Crystal Structure Of Human Germline Antibody Ighv3-23/Igkv3-11                                                                       | 2    |
| 5i1c | Crystal Structure Of Human Germline Antibody Ighv3-23/Igkv3-20                                                                       | 2.25 |
| 5i1d | Crystal Structure Of Human Germline Antibody Ighv3-23/Igkv4-1                                                                        | 2    |
| 5i1e | Crystal Structure Of Human Germline Antibody Ighv3-53/Igkv1-39                                                                       | 2.7  |
| 5i1g | Crystal Structure Of Human Germline Antibody Ighv3-53/Igkv3-11                                                                       | 2.3  |
| 5i1h | Crystal Structure Of Human Germline Antibody Ighv3-53/Igkv3-20                                                                       | 2.22 |
| 5i1i | Crystal Structure Of Human Germline Antibody Ighv3-53/Igkv4-1                                                                        | 2.5  |
| 5i1l | Crystal Structure Of Human Germline Antibody Ighv5-51/Igkv4-1                                                                        | 1.95 |
| 5i8c | Crystal Structure Of HIV-1 Clade A BG505 Fusion Peptide (Residue 512-520) In Complex With Broadly Neutralizing Antibody VRC34.01 Fab | 1.54 |
| 5ibt | UCA Fab (Unbound) From 6515 Lineage                                                                                                  | 2.4  |
| 5ibu | 6652 Fab (Unbound)                                                                                                                   | 1.71 |

|      |                                                                                                                                   |      |
|------|-----------------------------------------------------------------------------------------------------------------------------------|------|
| 5ifh | Crystal Structure Of The BCR Fab Fragment From Subset #2 Case P11475                                                              | 2.29 |
| 5ig7 | Crystal Structure Of Anti-Gliadin 1002-1E01 Fab Fragment In Complex Of Peptide PLQPQQPFP                                          | 1.97 |
| 5igx | Crystal Structure Of NIH45-46 Fab Germline Precursor In Complex With 426c.TM1deltaV1-3 Gp120                                      | 3.39 |
| 5ik3 | Crystal Structure Of Anti-Gliadin 1002-1E03 Fab Fragment                                                                          | 1.65 |
| 5iq7 | Crystal Structure Of 10E8-S74W Fab In Complex With An HIV-1 Gp41 Peptide.                                                         | 3.29 |
| 5iq9 | Crystal Structure Of 10E8v4 Fab In Complex With An HIV-1 Gp41 Peptide.                                                            | 2.4  |
| 5it2 | Structure Of A Transglutaminase 2-Specific Autoantibody 693-10-B06 Fab Fragment                                                   | 1.7  |
| 5itb | Crystal Structure Of The Anti-RSV F Fab 14N4                                                                                      | 2    |
| 5iwl | CD47-Diabody Complex                                                                                                              | 2.8  |
| 5j13 | Structural Basis For TSLP Antagonism By The Therapeutic Antibody Tezepelumab (MEDI9929 / AMG-157)                                 | 2.3  |
| 5j75 | Fluorogen Activating Protein AM2.2 In Complex With ML342                                                                          | 2    |
| 5jo4 | Antibody Fab Fragment Complex                                                                                                     | 2.53 |
| 5jof | Crystal Structure Of VRC03 Ghvglv Antigen-Binding Fragment.                                                                       | 3.21 |
| 5jr1 | Crystal Structure Of 10E8 Ghv-Maturel Antigen-Binding Fragment.                                                                   | 1.6  |
| 5jrp | Crystal Structure Of Monoclonal Antibody MR78 Fab                                                                                 | 2    |
| 5jw5 | Structure Of MEDI8852 Fab Fragment                                                                                                | 1.9  |
| 5jz7 | NGF IN COMPLEX WITH MEDI578 Scfv                                                                                                  | 3.4  |
| 5k59 | Crystal Structure Of Lukgh From Staphylococcus Aureus In Complex With A Neutralising Antibody                                     | 2.84 |
| 5k9j | Crystal Structure Of Multidonor HV6-1-Class Broadly Neutralizing Influenza A Antibody 56.A.09 Isolated Following H5 Immunization. | 1.9  |
| 5kg9 | Crystal Structure Of The Gp120 V2 Antibody RE505-22 Fab From IGH- And IGK-Humanized Mouse                                         | 2.3  |
| 5kn5 | Tgfalpa/Epiregulin Complex With Neutralizing Antibody LY3016859                                                                   | 2.8  |
| 5kw9 | Structural Basis For Norovirus Neutralization By A HBGA Blocking Human Iga Antibody                                               | 2.3  |
| 5l6y | Il13 In Complex With Tralokinumab                                                                                                 | 1.99 |
| 5lbs | Structural Basis Of Zika And Dengue Virus Potent Antibody Cross-Neutralization                                                    | 2.41 |



|      |                                                                                                                                                                  |      |
|------|------------------------------------------------------------------------------------------------------------------------------------------------------------------|------|
| 5lsp | 107_A07 Fab In Complex With Fragment Of The Met Receptor                                                                                                         | 2.61 |
| 5mes | Mcl1 Fab Complex In Complex With Compound 29                                                                                                                     | 2.24 |
| 5mvz | Fab 4AB007 Bound To Interleukin-1-Beta                                                                                                                           | 2.15 |
| 5n2k | Structure Of Unbound Briakinumab Fab                                                                                                                             | 2.22 |
| 5n4g | Human Fab Fragment 12E1 Against NHBA From Neisseria Meningitidis                                                                                                 | 2.75 |
| 5n4j | Human Fab Fragment 10C3 Against NHBA From Neisseria Meningitidis                                                                                                 | 1.5  |
| 5nb5 | Principles For Computational Design Of Antibodies                                                                                                                | 3    |
| 5nhw | Crystal Structure Of The Bimagrumab Fab                                                                                                                          | 1.78 |
| 5ob5 | Fab Complex With Grobeta. Advance: Increasing Our Knowledge Of Antibody Structural Space To Enable Faster And Better Decision-Making In Antibody Drug Discovery. | 1.65 |
| 5ogi | Complex Of A Binding Protein And Human Adenovirus C 5 Hexon                                                                                                      | 2.8  |
| 5sx5 | Crystal Structure Of Panitumumab In Complex With Epidermal Growth Factor Receptor Domain 3 Mutant S468R.                                                         | 2.5  |
| 5sy8 | Crystal Structure Of The Complex Of 10E8 Fab Light Chain Mutant1 And T117v2 HIV-1 MPER Scaffold                                                                  | 1.62 |
| 5t29 | Crystal Structure Of 10E8 Fab Light Chain Mutant3, Against The MPER Region Of The HIV-1 Env, In Complex With The MPER Epitope Scaffold T117v2                    | 2.03 |
| 5t4z | Structure Of The Anti-Hiv Antibody Dh501 That Binds Gp120 V3 Glycan And The Base Of V3 With Free Man9 Glycan                                                     | 1.99 |
| 5t5b | Crystal Structure Of The Complex Of 10e8 Fab Light Chain Mutant5 And T117v2 Hiv-1 Mper Scaffold                                                                  | 2.07 |
| 5t6l | Crystal Structure Of 10E8 Fab In Complex With The MPER Epitope Scaffold T117v2                                                                                   | 2.1  |
| 5tdn | Crystal Structure Of The Fab Fragment Of Anti-HER2 Antibody 4D5 With Redesigned Heavy And Light Chain Interfaces                                                 | 1.63 |
| 5tdo | Crystal Structure Of The Fab Fragment Of Anti-HER2 Antibody 4D5 With Redesigned Heavy And Light Chain Interfaces                                                 | 1.61 |
| 5te7 | Crystal Structure Of Broadly Neutralizing VRC01-Class Antibody N6 In Complex With HIV-1 Clade C Strain DU172.17 Gp120 Core                                       | 2.15 |
| 5tfl | Structure Of Chimeric 02-CC Fab, A VRC01-Like Germline Antibody                                                                                                  | 1.86 |
| 5tfs | Structure Of Chimeric 02-K Fab, A VRC01-Like Germline Antibody                                                                                                   | 2.32 |

|      |                                                                                                                                                                                            |      |
|------|--------------------------------------------------------------------------------------------------------------------------------------------------------------------------------------------|------|
| 5tfw | Crystal Structure Of 10E8 Fab Light Chain Mutant2 Against The MPER Region Of The HIV-1 Env, In Complex With T117v2 Epitope Scaffold                                                        | 2.17 |
| 5tgb | Structure Of Chimeric 02-CB Fab, A VRC01-Like Germline Antibody                                                                                                                            | 2.74 |
| 5tpl | Crystal Structure Of DH270.3 (Unliganded) From The DH270 Broadly Neutralizing N332-Glycan Dependent Lineage                                                                                | 2.5  |
| 5trp | Crystal Structure Of The Unliganded DH270 Cooperating Lineage Member DH272                                                                                                                 | 2.69 |
| 5tru | Structure Of The First-In-Class Checkpoint Inhibitor Ipilimumab Bound To Human CTLA-4                                                                                                      | 3    |
| 5ty6 | Crystal Structure Of The Broadly Neutralizing Influenza A Antibody VRC 315 13-1b02 Fab.                                                                                                    | 1.36 |
| 5tz2 | Crystal Structure Of Human CD47 ECD Bound To Fab Of C47B222                                                                                                                                | 2.3  |
| 5tzt | Crystal Structure Of Human CD47 ECD Bound To Fab Of C47B161                                                                                                                                | 2.89 |
| 5u0r | Crystal Structure Of DH270.UCA1 (Unliganded) From The DH270 Broadly Neutralizing N332-Glycan Dependent Lineage                                                                             | 3.3  |
| 5u0u | Crystal Structure Of DH270.1 (Unliganded, Single-Chain Fv) From The DH270 Broadly Neutralizing N332-Glycan Dependent Lineage                                                               | 3.43 |
| 5u15 | Crystal Structure Of DH270.UCA3 (Unliganded) From The DH270 Broadly Neutralizing N332-Glycan Dependent Lineage                                                                             | 2.26 |
| 5u3j | Crystal Structure Of DH511.1 Fab In Complex With HIV-1 Gp41 MPER Peptide                                                                                                                   | 2.74 |
| 5u3l | Crystal Structure Of DH511.2 Fab In Complex With HIV-1 Gp41 MPER 670-683 Peptide                                                                                                           | 2.16 |
| 5u3o | Crystal Structure Of DH511.2_K3 Fab In Complex With HIV-1 Gp41 MPER Peptide                                                                                                                | 1.76 |
| 5u3p | Crystal Structure Of DH511.4 Fab                                                                                                                                                           | 1.5  |
| 5u4r | Crystal Structure Of The Broadly Neutralizing Influenza A Antibody VRC 315 53-1A09 Fab.                                                                                                    | 1.76 |
| 5u68 | Structural Basis For Antibody Cross-Neutralization Of Respiratory Syncytial Virus And Human Metapneumovirus                                                                                | 3.08 |
| 5u7o | Crystal Structure Of HIV-1 BG505 SOSIP.664 Prefusion Env Trimer Bound To Small Molecule HIV-1 Entry Inhibitor BMS-626529 In Complex With Human Antibodies PGT122 And 35O22 At 3.8 Angstrom | 3.03 |
| 5uby | Fab Structure Of Anti-HIV-1 Gp120 Mab 1A8                                                                                                                                                  | 2.6  |
| 5ubz | Fab Structure Of HIV Gp120 Specific Mab 1E12                                                                                                                                               | 2.75 |

|      |                                                                                                                          |      |
|------|--------------------------------------------------------------------------------------------------------------------------|------|
| 5ucb | Structure Of Antigen-Fab Complex With Engineered Switch Residue Region.                                                  | 1.52 |
| 5udc | Crystal Structure Of RSV F A2 Bound To MEDI8897                                                                          | 3.45 |
| 5uea | Structure Of Antigen-Fab Complex With Histone Chaperone ASF1                                                             | 1.7  |
| 5uek | Structure Of Antigen-Fab 12E Complex With Histone Chaperone ASF1                                                         | 1.7  |
| 5uem | Crystal Structure Of 354NC37 Fab In Complex With HIV-1 Clade AE Strain 93TH057 Gp120                                     | 2.7  |
| 5ukn | Structure Of Unliganded Anti-Gp120 CD4bs Antibody DH522UCA Fab                                                           | 1.75 |
| 5uko | Structure Of Unliganded Anti-Gp120 CD4bs Antibody DH522IA Fab                                                            | 2.3  |
| 5ukp | Structure Of Unliganded Anti-Gp120 CD4bs Antibody DH522.1 Fab                                                            | 2    |
| 5ukq | Structure Of Unliganded Anti-Gp120 CD4bs Antibody DH522.2 Fab                                                            | 2.1  |
| 5uoe | Crystal Structure Analysis Of Elbow-Engineered-Fab-Bound Human Insulin Degrading Enzyme (IDE)                            | 3.8  |
| 5ur8 | Human Antibody Fragment (Fab) To Meningococcal Factor H Binding Protein                                                  | 1.76 |
| 5ush | Structure Of Vaccinia Virus D8 Protein Bound To Human Fab Vv66                                                           | 2.3  |
| 5usi | Structure Of Vaccinia Virus D8 Protein Bound To Human Fab Vv138                                                          | 2.9  |
| 5usl | Structure Of Vaccinia Virus D8 Protein Bound To Human Fab Vv304                                                          | 2.9  |
| 5v7r | Cyrstal Structure Of Anti-Tau Antibody CBTAU-7.1 Fab                                                                     | 2.3  |
| 5v7u | Cyrstal Structure Of Anti-Tau Antibody CBTAU-22.1 Fab                                                                    | 1.64 |
| 5vag | Crystal Structure Of H7-Specific Antibody M826 In Complex With The HA1 Domain Of Hemagglutinin From H7N9 Influenza Virus | 1.9  |
| 5veb | Crystal Structure Of A Fab Binding To Extracellular Domain 5 Of Cadherin-6                                               | 2.34 |
| 5vf6 | Crystal Structure Of Single Chain Variable Fragment (Scfv45).                                                            | 1.63 |
| 5vic | Crystal Structure Of Anti-Zika Antibody Z004 Bound To DENV-1 Envelope Protein DIII                                       | 3    |
| 5vig | Crystal Structure Of Anti-Zika Antibody Z006 Bound To Zika Virus Envelope Protein DIII                                   | 3    |
| 5vl7 | PCSK9 Complex With Fab33                                                                                                 | 3.5  |
| 5vob | Crystal Structure Of HCMV Pentamer In Complex With Neutralizing Antibody 8I21                                            | 3.02 |
| 5vsi | CH1/Ckappa Fab Mutant 15.1                                                                                               | 1.51 |
| 5vvf | Crystal Structure Of 354BG1 Fab                                                                                          | 2    |

|      |                                                                                                                                               |      |
|------|-----------------------------------------------------------------------------------------------------------------------------------------------|------|
| 5w05 | Anti-Tissue Factor Antibody M59, A Humanized Version Of 10h10                                                                                 | 1.64 |
| 5w06 | Human Tissue Factor In Complex With Antibody M1587                                                                                            | 2.6  |
| 5w08 | A/Texas/50/2012(H3N2) Influenza Hemagglutinin In Complex With K03.12 Fab                                                                      | 2.6  |
| 5w6c | UCA Fab (Unbound) From 6649 Lineage                                                                                                           | 1.63 |
| 5w6g | Human Antibody 6649 In Complex With Influenza Hemagglutinin H1 Solomon Islands                                                                | 2.79 |
| 5waw | Fcavance: Increasing Our Knowledge Of Antibody Structural Space To Enable Faster And Better Decision-Making In Antibody Drug Discovery        | 2.25 |
| 5wca | Crystal Structure Of The Broadly Neutralizing Influenza A Antibody VRC 315 27-1C08 Fab.                                                       | 1.37 |
| 5wcd | Crystal Structure Of The Broadly Neutralizing Influenza A Antibody VRC 315 04-1D02 Fab.                                                       | 1.81 |
| 5whj | Crystal Structure Of Fab Fragment Of Anti-Fc $\gamma$ n Antibody DX-2507                                                                      | 2.15 |
| 5wk2 | Crystal Structure Of Anti-Ccl17 Antibody M116                                                                                                 | 1.5  |
| 5wuv | Crystal Structure Of Certolizumab Fab                                                                                                         | 1.95 |
| 5wym | Crystal Structure Of An Anti-Connexin26 Scfv                                                                                                  | 2.65 |
| 5x8m | PD-L1 In Complex With Durvalumab                                                                                                              | 2.66 |
| 5xaj | Structural Mimicry Of The Dengue Virus Envelope Glycoprotein Revealed By The Crystallographic Study Of An Idiotype-Anti-Idiotype Fab Complex. | 2.5  |
| 5xhv | Crystal Structure Of Fab S40 In Complex With Influenza Hemagglutinin, HA1 Subunit.                                                            | 3.35 |
| 5xku | Crystal Structure Of Hemagglutinin Globular Head From An H7N9 Influenza Virus In Complex With A Neutralizing Antibody Hnigga6                 | 1.78 |
| 5xxy | Crystal Structure Of PD-L1 Complexed With Atezolizumab Fab At 2.9A                                                                            | 2.9  |
| 5y11 | SFTSV GN With Neutralizing Antibody Mab4-5                                                                                                    | 2.1  |
| 5y9k | Structure Of The Belimumab Fab Fragment                                                                                                       | 1.9  |
| 5yax | Crystal Structure Of A Human Neutralizing Antibody Bound To A HBV Pres1 Peptide                                                               | 2.5  |
| 6axk | Crystal Structure Of Fab311 Complex                                                                                                           | 2.1  |
| 6axl | Crystal Structure Of Fab317 Complex                                                                                                           | 2.4  |
| 6ayz | Crystal Structure Of Asf1-Fab 12E Complex                                                                                                     | 2.1  |
| 6az2 | Crystal Structure Of Asf1-Fab 12E Complex                                                                                                     | 2.48 |

|      |                                                                                                                                   |      |
|------|-----------------------------------------------------------------------------------------------------------------------------------|------|
| 6azm | Crystal Structure Of The 580 Germline Antibody Bound To Circumsporozoite Protein NANP 5-Mer                                       | 1.6  |
| 6azx | Crystal Structure Of The Neutralizing Anti-Circumsporozoite Protein 663 Antibody                                                  | 2.1  |
| 6azz | Crystal Structure Of Pfs25 In Complex With The Transmission Blocking Antibody 1190                                                | 2.4  |
| 6b08 | Crystal Structure Of Pfs25 In Complex With The Transmission Blocking Antibody 1276                                                | 2.2  |
| 6b0a | Crystal Structure Of Pfs25 In Complex With The Transmission Blocking Antibody 1269                                                | 2.5  |
| 6b0e | Crystal Structure Of Pfs25 In Complex With The Transmission Blocking Antibody 1260                                                | 3.3  |
| 6b0g | Crystal Structure Of Pfs25 In Complex With The Transmission Blocking Antibody 1245                                                | 1.9  |
| 6b0h | Crystal Structure Of Pfs25 In Complex With The Transmission Blocking Antibody 1262                                                | 2.7  |
| 6b0w | Crystal Structure Of The Anti-Circumsporozoite Protein 1710 Antibody                                                              | 1.9  |
| 6b14 | Crystal Structure Of Spinach RNA Aptamer In Complex With Fab BL3-6S97N                                                            | 1.64 |
| 6b3d | Crystal Structure Of Anti-HIV Antibody PGT128 In Complex With A Bacterially Derived Synthetic Mimetic Of Man9.                    | 2.27 |
| 6b3k | Crystal Structure Of Mutant Spinach RNA Aptamer In Complex With Fab BL3-6                                                         | 2.09 |
| 6be3 | Crystal Structure Of A Polysaccharide-Binding Human Fab (F598) In Complex With N-Acetyl-D-Glucosamine (Glcnac)                    | 1.6  |
| 6bhz | Trastuzumab Fab D185a (Light Chain) Mutant.                                                                                       | 1.75 |
| 6bp2 | Therapeutic Human Monoclonal Antibody MR191 Bound To A Marburgvirus Glycoprotein                                                  | 3.17 |
| 6c6z | Crystal Structure Of Potent Neutralizing Antibody CDC2-C2 In Complex With MERS-Cov S1 RBD                                         | 2.1  |
| 6ehw | Scfv Abvance: Increasing Our Knowledge Of Antibody Structural Space To Enable Faster And Better Decision Making In Drug Discovery | 2.19 |
| 6ehx | Scfv Abvance: Increasing Our Knowledge Of Antibody Structural Space To Enable Faster And Better Decision Making In Drug Discovery | 2.2  |
| 6ehy | Scfv Abvance: Increasing Our Knowledge Of Antibody Structural Space To Enable Faster And Better Decision Making In Drug Discovery | 2.25 |

|      |                                                                                                                 |     |
|------|-----------------------------------------------------------------------------------------------------------------|-----|
| 6erx | Crystal Structure Of Human BAFF In Complex With Fab Fragment Of Anti-BAFF Antibody Belimumab                    | 2.9 |
| 8fab | Crystal Structure Of The Fab Fragment From The Human Myeloma Immunoglobulin Igg Hil At 1.8 Angstroms Resolution | 1.8 |

Table S2: Antibody Benchmark Set

| <b>PDB-ID</b> | <b>Name</b>                                                                                                                                                  | <b>Resolution (Å)</b> | <b>H3 loop length</b> |
|---------------|--------------------------------------------------------------------------------------------------------------------------------------------------------------|-----------------------|-----------------------|
| 1adq          | Crystal Structure Of A Human Igm Rheumatoid Factor Fab In Complex With Its Autoantigen Igg Fc                                                                | 3.15                  | 14                    |
| 1afv          | Hiv-1 Capsid Protein (P24) Complex With Fab25.3                                                                                                              | 3.7                   | 11                    |
| 1egj          | Domain 4 Of The Beta Common Chain In Complex With An Antibody                                                                                                | 2.8                   | 10                    |
| 1eo8          | Influenza Virus Hemagglutinin Complexed With A Neutralizing Antibody                                                                                         | 2.8                   | 9                     |
| 1hez          | Antibody-Antigen Complex                                                                                                                                     | 2.7                   | 12                    |
| 1i9r          | Structure Of Cd40l In Complex With The Fab Fragment Of Humanized 5c8 Antibody                                                                                | 3.1                   | 9                     |
| 1iqd          | Human Factor VIII C2 Domain Complexed To Human Monoclonal BO2C11 Fab.                                                                                        | 2                     | 8                     |
| 1kb5          | Murine T-Cell Receptor Variable Domain/Fab Complex                                                                                                           | 2.5                   | 10                    |
| 1ken          | Influenza Virus Hemagglutinin Complexed With An Antibody That Prevents The Hemagglutinin Low Ph Fusogenic Transition                                         | 3.5                   | 11                    |
| 1ncb          | Crystal Structures Of Two Mutant Neuraminidase-Antibody Complexes With Amino Acid Substitutions In The Interface                                             | 2.5                   | 11                    |
| 1nmb          | The Structure Of A Complex Between The Nc10 Antibody And Influenza Virus Neuraminidase And Comparison With The Overlapping Binding Site Of The Nc41 Antibody | 2.2                   | 13                    |
| 1nsn          | The Crystal Structure Of Antibody N10-Staphylococcal Nuclease Complex At 2.9 Angstroms Resolution                                                            | 2.8                   | 4                     |
| 1ob1          | Crystal Structure Of A Fab Complex Whith Plasmodium Falciparum MSP1-19                                                                                       | 2.9                   | 11                    |
| 1orq          | X-Ray Structure Of A Voltage-Dependent Potassium Channel In Complex With An Fab                                                                              | 3.2                   | 9                     |
| 1osp          | Crystal Structure Of Outer Surface Protein A Of Borrelia Burgdorferi Complexed With A Murine Monoclonal Antibody Fab                                         | 1.95                  | 12                    |
| 1qfu          | Influenza Virus Hemagglutinin Complexed With A Neutralizing Antibody                                                                                         | 2.8                   | 13                    |
| 1rjl          | Structure Of The Complex Between Ospb-CT And Bactericidal Fab-H6831                                                                                          | 2.6                   | 11                    |

|      |                                                                                                                                         |      |    |
|------|-----------------------------------------------------------------------------------------------------------------------------------------|------|----|
| 1yjd | Crystal Structure Of Human CD28 In Complex With The Fab Fragment Of A Mitogenic Antibody (5.11A1)                                       | 2.7  | 11 |
| 1yqv | The Crystal Structure Of The Antibody Fab Hyhel5 Complex With Lysozyme At 1.7A Resolution                                               | 1.7  | 7  |
| 1ztx | West Nile Virus Envelope Protein DIII In Complex With Neutralizing E16 Antibody Fab                                                     | 2.5  | 10 |
| 2adf | Crystal Structure And Paratope Determination Of 82D6A3, An Antithrombotic Antibody Directed Against The Von Willebrand Factor A3-Domain | 1.9  | 9  |
| 2arj | CD8alpha-Alpha In Complex With YTS 105.18 Fab                                                                                           | 2.88 | 9  |
| 2hmi | Hiv-1 Reverse Transcriptase/Fragment Of Fab 28/Dna Complex                                                                              | 2.8  | 13 |
| 2i9l | Structure Of Fab 7D11 From A Neutralizing Antibody Against The Poxvirus L1 Protein                                                      | 3.1  | 10 |
| 2jel | Jel42 Fab/Hpr Complex                                                                                                                   | 2.5  | 9  |
| 2nyy | Crystal Structure Of Botulinum Neurotoxin Type A Complexed With Monoclonal Antibody CR1                                                 | 2.61 | 9  |
| 2nz9 | Crystal Structure Of Botulinum Neurotoxin Type A Complexed With Monoclonal Antibody AR2                                                 | 3.79 | 9  |
| 2q8b | Structure Of The Malaria Antigen AMA1 In Complex With A Growth-Inhibitory Antibody                                                      | 2.3  | 3  |
| 2qr0 | Structure Of VEGF Complexed To A Fab Containing TYR And SER In The Cdrs                                                                 | 3.5  | 9  |
| 2r29 | Neutralization Of Dengue Virus By A Serotype Cross-Reactive Antibody Elucidated By Cryoelectron Microscopy And X-Ray Crystallography    | 3    | 7  |
| 2r56 | Crystal Structure Of A Recombinant Ige Fab Fragment In Complex With Bovine Beta-Lactoglobulin Allergen                                  | 2.8  | 12 |
| 2xra | Crystal Structure Of The HK20 Fab In Complex With A Gp41 Mimetic 5- Helix                                                               | 2.3  | 13 |
| 2ypv | Crystal Structure Of The Meningococcal Vaccine Antigen Factor H Binding Protein In Complex With A Bactericidal Antibody                 | 1.8  | 10 |
| 2zch | Crystal Structure Of Human Prostate Specific Antigen Complexed With An Activating Antibody                                              | 2.83 | 13 |
| 2zuq | Crystal Structure Of Dsbb-Fab Complex                                                                                                   | 3.3  | 6  |
| 3b9k | Crystal Structure Of CD8alpha-Beta In Complex With YTS 156.7 FAB                                                                        | 2.7  | 9  |



|      |                                                                                                                                                   |       |    |
|------|---------------------------------------------------------------------------------------------------------------------------------------------------|-------|----|
| 3b9f | X-Ray Crystal Structure Of The SARS Coronavirus Spike Receptor Binding Domain In Complex With F26G19 Fab                                          | 3     | 12 |
| 3d85 | Crystal Structure Of IL-23 In Complex With Neutralizing FAB                                                                                       | 1.9   | 6  |
| 3eff | The Crystal Structure Of Full-Length Kcsa In Its Closed Conformation                                                                              | 3.8   | 15 |
| 3fmg | Structure Of Rotavirus Outer Capsid Protein VP7 Trimer In Complex With A Neutralizing Fab                                                         | 3.4   | 12 |
| 3ks0 | Crystal Structure Of The Heme Domain Of Flavocytochrome B2 In Complex With Fab B2B4                                                               | 2.7   | 9  |
| 3liz | Crystal Structure Of Bla G 2 Complexed With Fab 4C3                                                                                               | 1.8   | 10 |
| 3opz | Crystal Structure Of Trans-Sialidase In Complex With The Fab Fragment Of A Neutralizing Monoclonal Igg Antibody                                   | 3.4   | 10 |
| 3q3g | Crystal Structure Of A-Domain In Complex With Antibody                                                                                            | 2.7   | 13 |
| 3r1g | Structure Basis Of Allosteric Inhibition Of BACE1 By An Exosite-Binding Antibody                                                                  | 2.8   | 10 |
| 3rkd | Hepatitis E Virus E2s Domain (Genotype I) In Complex With A Neutralizing Antibody                                                                 | 1.9   | 14 |
| 3ubx | Crystal Structure Of The Mouse CD1d-C20:2-Agalcer-L363 Mab Fab Complex                                                                            | 3.1   | 11 |
| 3v7a | Structural Basis For Broad Detection Of Genogroup II Noroviruses By A Monoclonal Antibody That Binds To A Site Occluded In The Viral Particle     | 3.297 | 11 |
| 3vg9 | Crystal Structure Of Human Adenosine A2A Receptor With An Allosteric Inverse-Agonist Antibody At 2.7 Å Resolution                                 | 2.7   | 15 |
| 3vrl | Crystal Structure Of BMJ4 P24 Capsid Protein In Complex With A10F9 Fab                                                                            | 3.2   | 13 |
| 3wfd | Reduced And Acetaldoxime-Bound Cytochrome C-Dependent Nitric Oxide Reductase (Cnor) From Pseudomonas Aeruginosa In Complex With Antibody Fragment | 2.3   | 15 |
| 4ag4 | Crystal Structure Of A DDR1-Fab Complex                                                                                                           | 2.8   | 7  |
| 4bz1 | Structure Of Dengue Virus EDIII In Complex With Fab 3e31                                                                                          | 2.15  | 8  |
| 4bz2 | Structure Of Dengue Virus EDIII In Complex With Fab 2D73                                                                                          | 2.03  | 12 |
| 4cad | Mechanism Of Farnesylated CAAX Protein Processing By The Integral Membrane Protease Rce1                                                          | 2.5   | 16 |

|      |                                                                                                                                                                  |       |    |
|------|------------------------------------------------------------------------------------------------------------------------------------------------------------------|-------|----|
| 4cmh | Crystal Structure Of CD38 With A Novel CD38-Targeting Antibody SAR650984                                                                                         | 1.53  | 11 |
| 4ffv | Crystal Structure Of Dipeptidyl Peptidase IV (DPP4, DPP-IV, CD26) In Complex With 11A19 Fab                                                                      | 2.4   | 8  |
| 4h88 | Structure Of POM1 FAB Fragment Complexed With Mouse Prpc Fragment 120-230                                                                                        | 1.9   | 10 |
| 4ht1 | Human TWEAK In Complex With The Fab Fragment Of A Neutralizing Antibody                                                                                          | 2.498 | 11 |
| 4jr9 | Crystal Structure Of Nitrate/Nitrite Exchanger Nark                                                                                                              | 2.6   | 9  |
| 4jzj | Crystal Structure Of Receptor-Fab Complex                                                                                                                        | 2.801 | 11 |
| 4k2u | Crystal Structure Of Pfeba-175 F1 In Complex With R218 Antibody Fab Fragment                                                                                     | 2.45  | 12 |
| 4lvn | Crystal Structure Of Pfsu1-Prodomain-NIMP.M7 Fab Complex                                                                                                         | 2.25  | 11 |
| 4np4 | Clostridium Difficile Toxin B CROP Domain In Complex With FAB Domains Of Neutralizing Antibody Bezlotoxumab                                                      | 2.89  | 10 |
| 4plj | Hepatitis E Virus E2s Domain (Genotype IV) In Complex With A Neutralizing Antibody 8G12                                                                          | 2.3   | 14 |
| 4q6i | Crystal Structure Of Murine 2D5 Fab, A Potent Anti-CD4 HIV-1-Neutralizing Antibody In Complex With CD4                                                           | 3.65  | 11 |
| 4qww | Crystal Structure Of The Fab410-Bfache Complex                                                                                                                   | 2.7   | 14 |
| 4rdq | Calcium-Activated Chloride Channel Bestrophin-1, From Chicken, In Complex With Fab Antibody Fragments, Chloride And Calcium                                      | 2.85  | 7  |
| 4rgm | Structure Of Staphylococcal Enterotoxin B Bound To The Neutralizing Antibody 20B1                                                                                | 2.689 | 12 |
| 4rgo | Structure Of Staphylococcal Enterotoxin B Bound To The Neutralizing Antibody 14G8                                                                                | 1.8   | 12 |
| 4tnw | C. Elegans Glutamate-Gated Chloride Channel (Gluc1) In Complex With Fab And Popc In A Lipid-Modulated Conformation                                               | 3.2   | 13 |
| 4uao | Crystal Structure Of Apical Membrane Antigen 1 From Plasmodium Knowlesi In Complex With An Invasion Inhibitory Antibody                                          | 3.1   | 12 |
| 4zpt | Structure Of MERS-Coronavirus Spike Receptor-Binding Domain (England1 Strain) In Complex With Vaccine-Elicited Murine Neutralizing Antibody D12 (Crystal Form 1) | 2.591 | 7  |
| 5bv7 | Crystal Structure Of Human LCAT (L4F, N5D) In Complex With Fab Of An Agonistic Antibody                                                                          | 2.45  | 16 |

|      |                                                                                                  |       |    |
|------|--------------------------------------------------------------------------------------------------|-------|----|
| 5czx | Crystal Structure Of Notch3 NRR In Complex With 20358 Fab                                        | 2.1   | 10 |
| 5dfv | Crystal Structure Of Human Cd81 Large Extracellular Loop In Complex With Murine Fab Fragment K04 | 2.8   | 12 |
| 5hbt | Complex Structure Of Fab35 And Human Nachr Alpha1                                                | 2.61  | 12 |
| 5kvf | Zika Specific Antibody, ZV-64, Bound To ZIKA Envelope DIII                                       | 1.4   | 10 |
| 5lqb | Complex Structure Of Human IL2 Mutant, Proleukin, With Fab Fragment Of NARA1 Antibody            | 1.95  | 12 |
| 5mhr | T3D Reovirus Sigma1 Complexed With 9BG5 Fab Fragments                                            | 3     | 12 |
| 5t5f | Neisseria Meningitidis Factor H Binding Protein In Complex With Monoclonal Antibody JAR5         | 2.98  | 13 |
| 5ush | Structure Of Vaccinia Virus D8 Protein Bound To Human Fab Vv66                                   | 2.3   | 13 |
| 5usl | Structure Of Vaccinia Virus D8 Protein Bound To Human Fab Vv304                                  | 2.9   | 15 |
| 5veb | Crystal Structure Of A Fab Binding To Extracellular Domain 5 Of Cadherin-6                       | 2.34  | 9  |
| 5y9c | Crystal Structure Of HPV58 Pentamer In Complex With The Fab Fragment Of Antibody A12A3           | 3.443 | 11 |
| 5y9f | Crystal Structure Of HPV59 Pentamer In Complex With The Fab Fragment Of Antibody 28F10           | 3.35  | 14 |
| 6bpa | Plasmodium Vivax Reticulocyte Binding Protein 2b (Pvrpb2b) Bound To Monoclonal Antibody 3E9      | 2.53  | 11 |

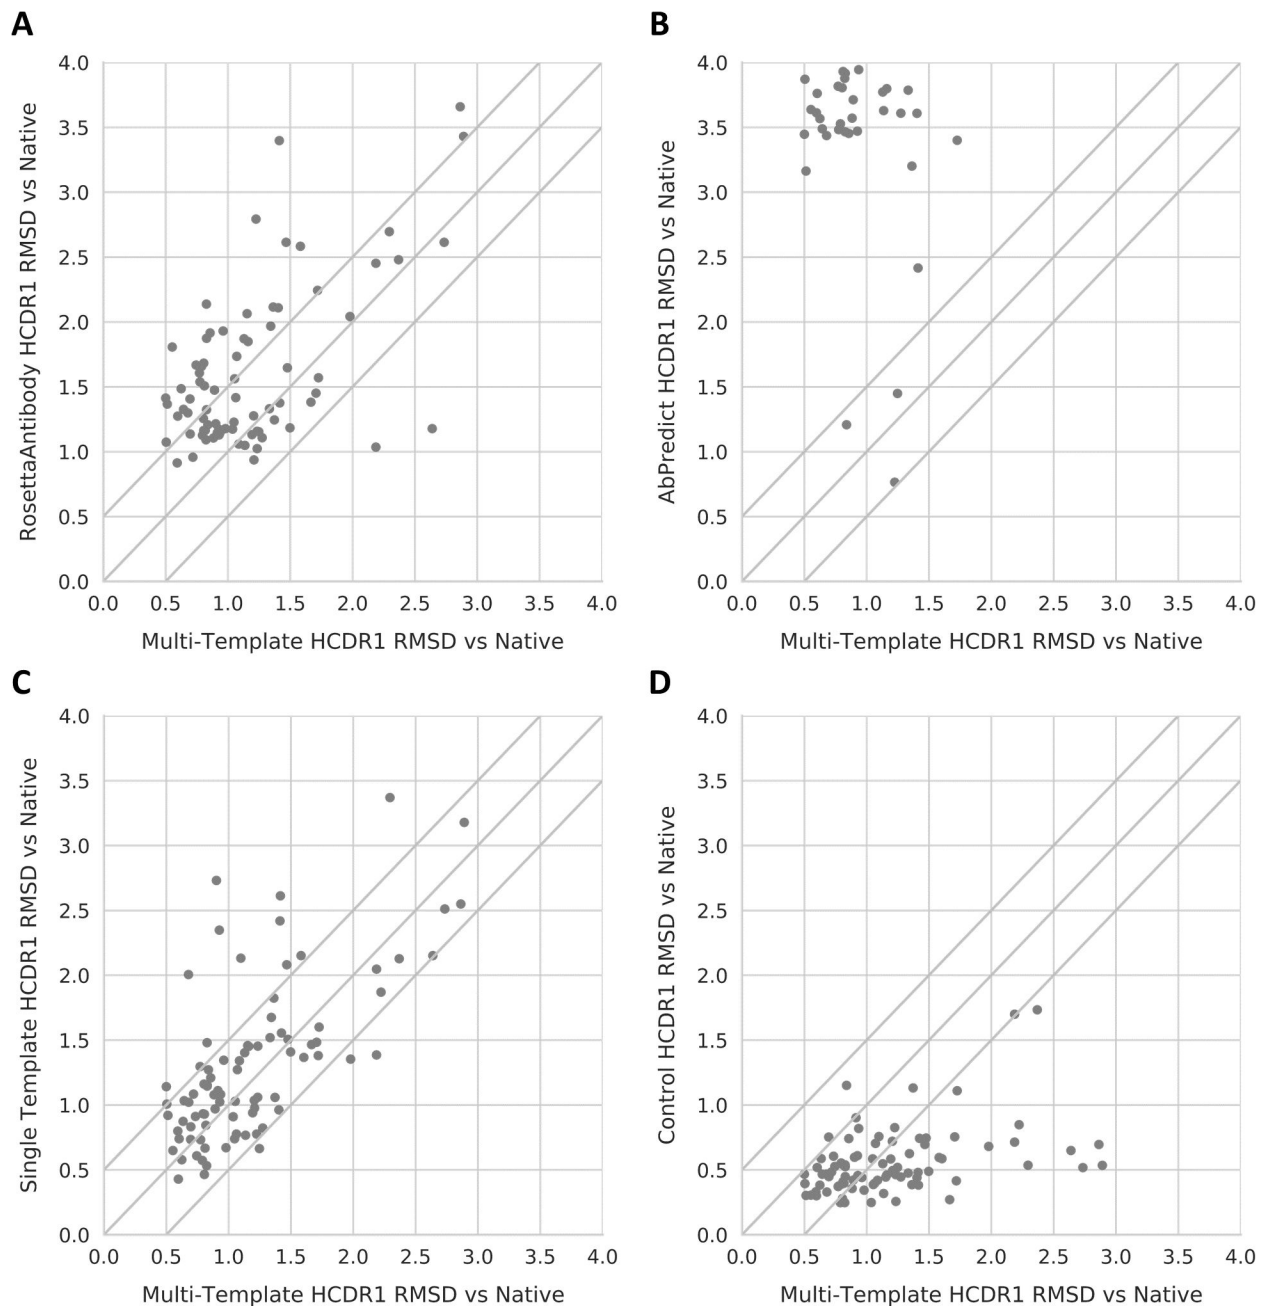

Figure S1: Comparison of antibody HCDR1 modeling performance for the best models produced by each method to the best multi-template models. The performance of RosettaAntibody (A), AbPredict (B), Single Template (C), and our control method (D) were each individually compared to our multi-template method by graphing that method's median RMSD against our multi-template method's median RMSD for each antibody. Each chart has a line at  $y=x$  representing equal performance between methods. Points above the line represent cases where our multi-template method outperformed another method, whereas points below the line represent the opposite case.

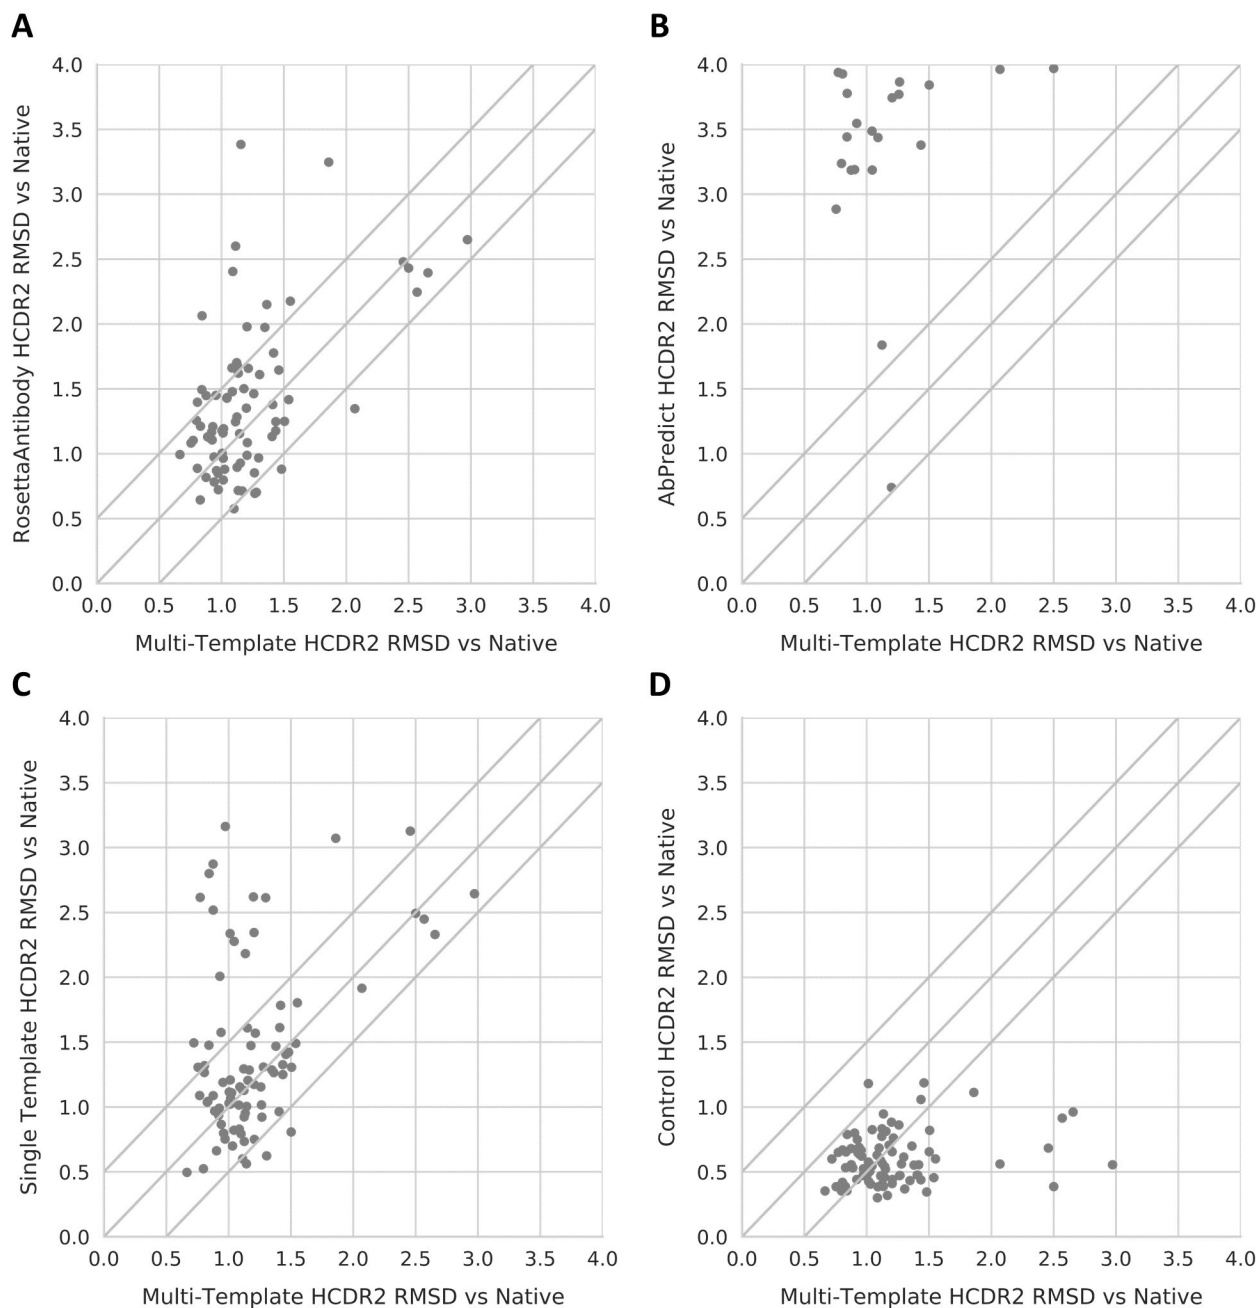

Figure S2: Comparison of antibody HCDR2 modeling performance for the best models produced by each method to the best multi-template models. The performance of RosettaAntibody (A), AbPredict (B), Single Template (C), and our control method (D) were each individually compared to our multi-template method by graphing that method's median RMSD against our multi-template method's median RMSD for each antibody. Each chart has a line at  $y=x$  representing equal performance between methods. Points above the line represent cases where our multi-template method outperformed another method, whereas points below the line represent the opposite case.

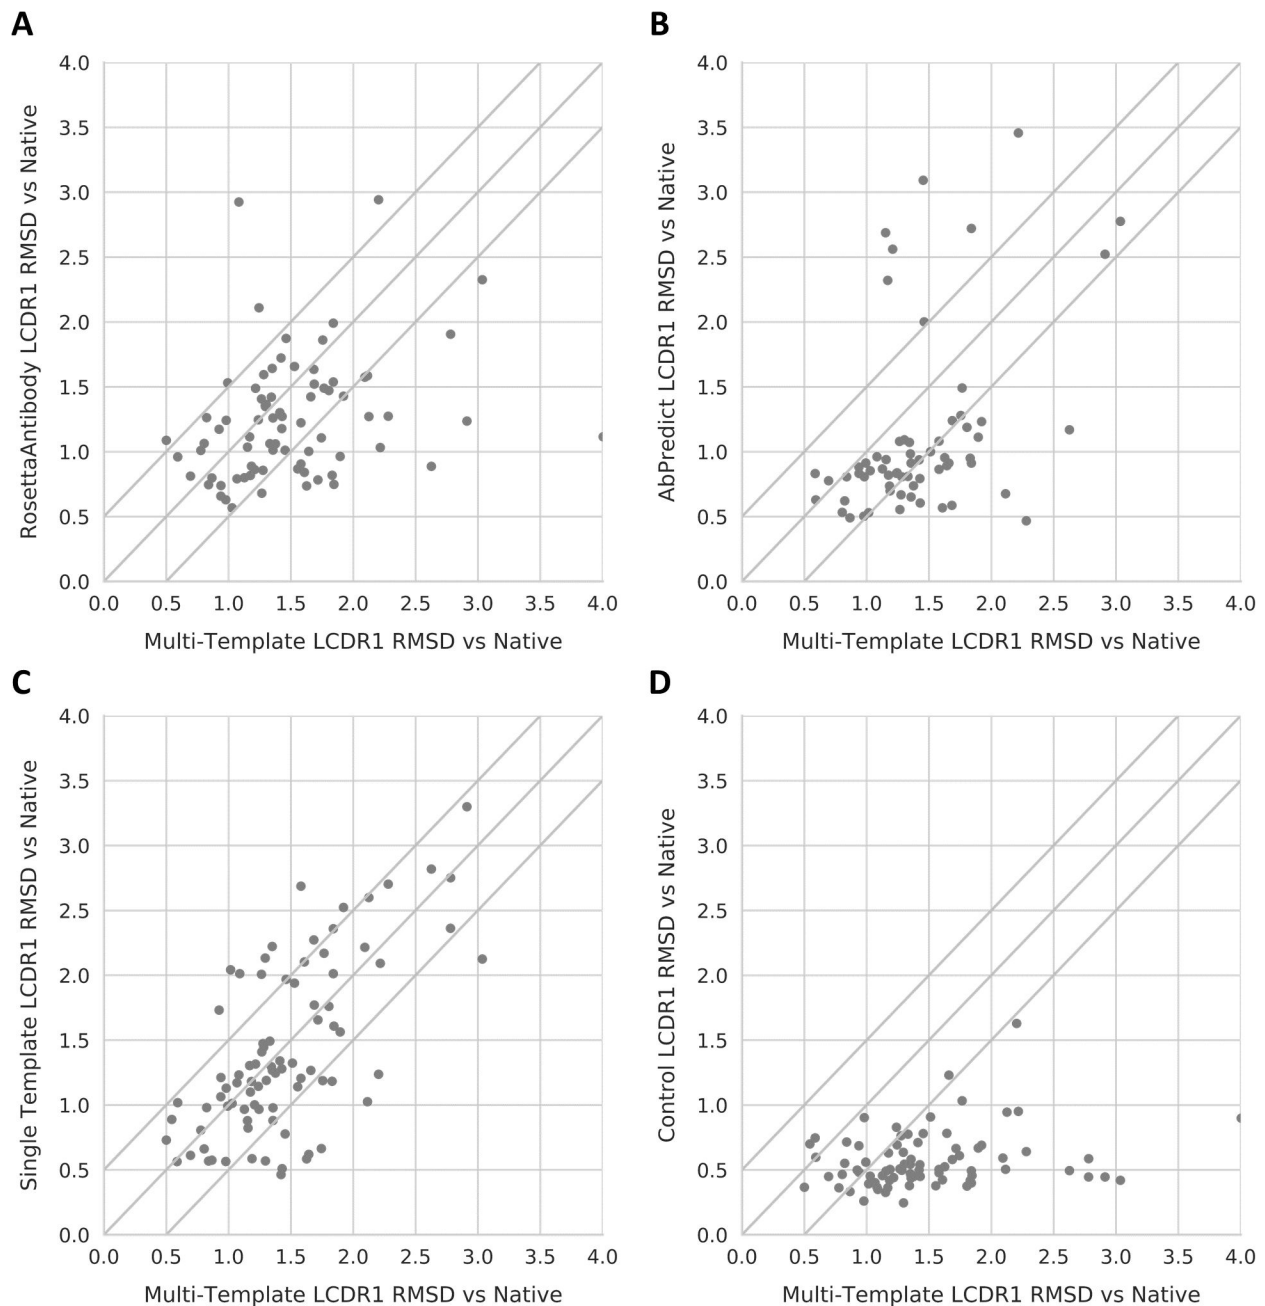

Figure S3: Comparison of antibody LCDR1 modeling performance for the best models produced by each method to the best multi-template models. The performance of RosettaAntibody (A), AbPredict (B), Single Template (C), and our control method (D) were each individually compared to our multi-template method by graphing that method's median RMSD against our multi-template method's median RMSD for each antibody. Each chart has a line at  $y=x$  representing equal performance between methods. Points above the line represent cases where our multi-template method outperformed another method, whereas points below the line represent the opposite case.

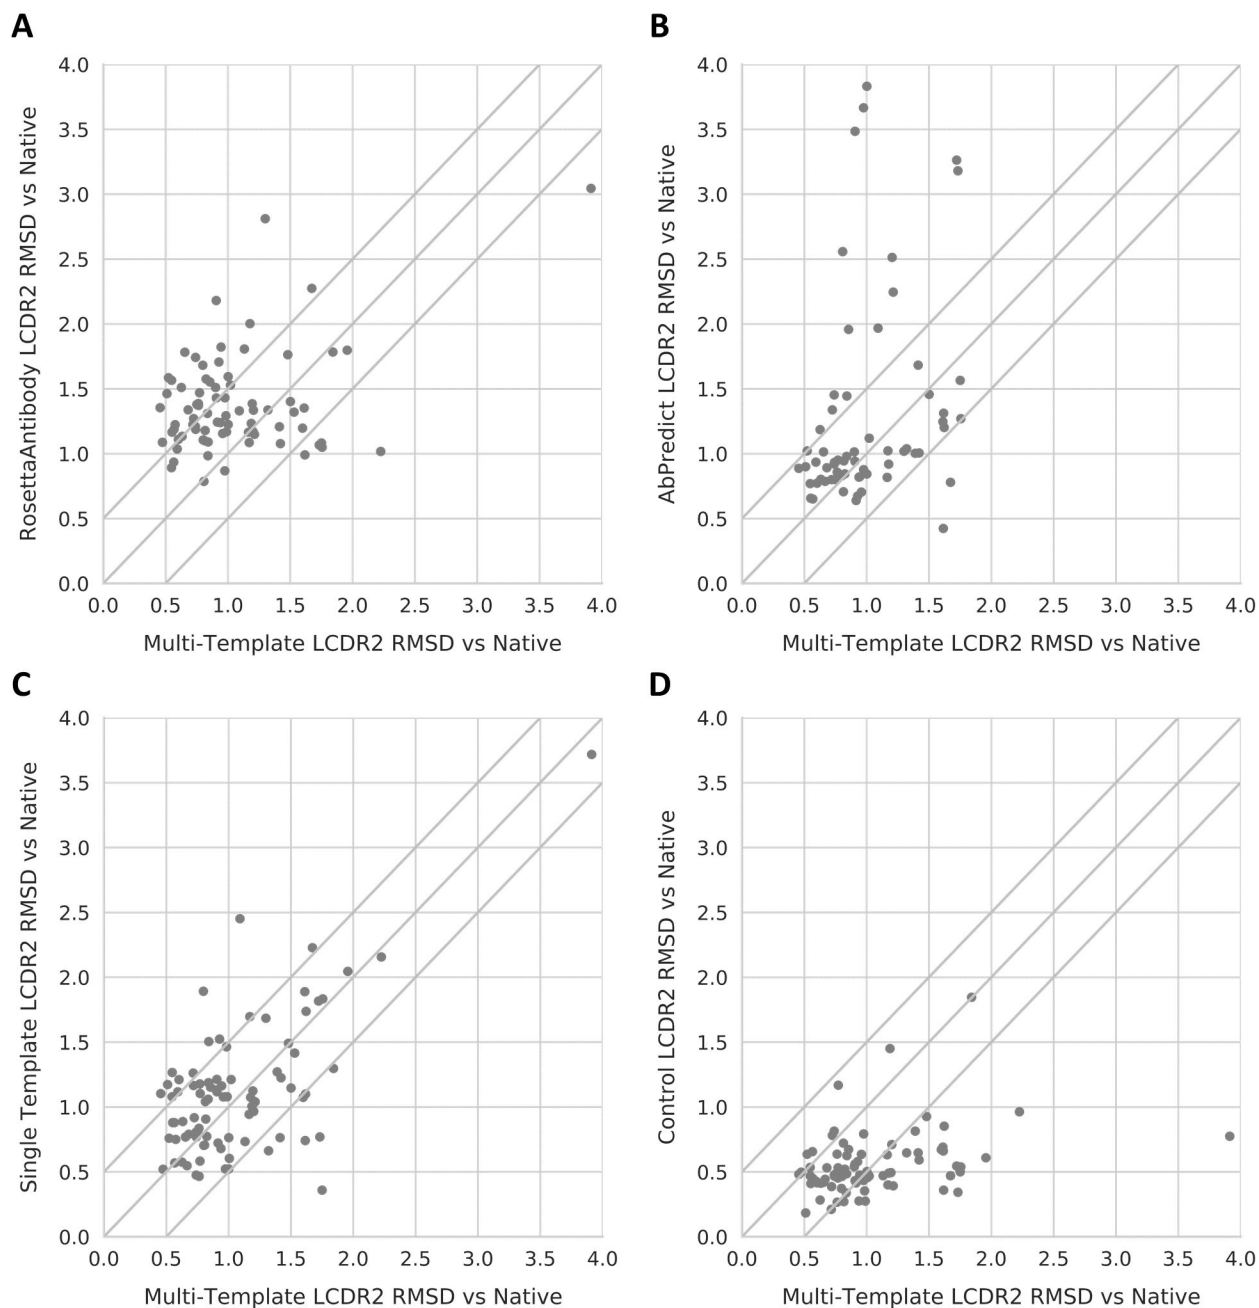

Figure S4: Comparison of antibody LCDR2 modeling performance for the best models produced by each method to the best multi-template models. The performance of RosettaAntibody (A), AbPredict (B), Single Template (C), and our control method (D) were each individually compared to our multi-template method by graphing that method's median RMSD against our multi-template method's median RMSD for each antibody. Each chart has a line at  $y=x$  representing equal performance between methods. Points above the line represent cases where our multi-template method outperformed another method, whereas points below the line represent the opposite case.

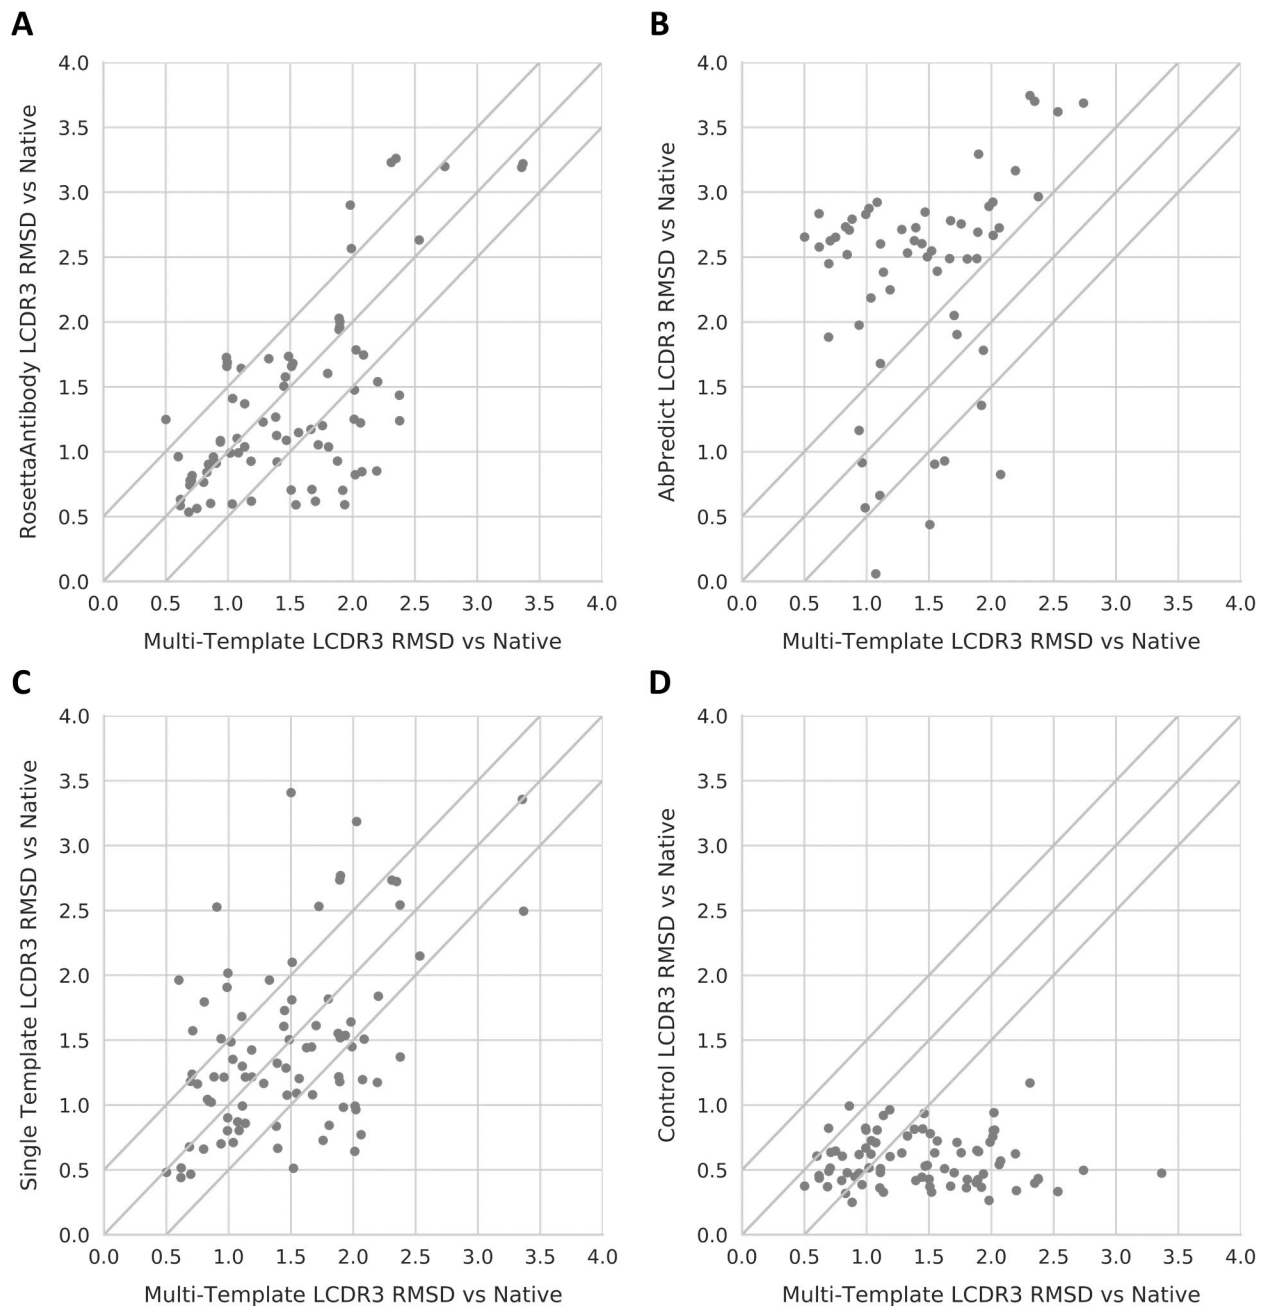

Figure S5: Comparison of antibody LCDR3 modeling performance for the best models produced by each method to the best multi-template models. The performance of RosettaAntibody (A), AbPredict (B), Single Template (C), and our control method (D) were each individually compared to our multi-template method by graphing that method's median RMSD against our multi-template method's median RMSD for each antibody. Each chart has a line at  $y=x$  representing equal performance between methods. Points above the line represent cases where our multi-template method outperformed another method, whereas points below the line represent the opposite case.



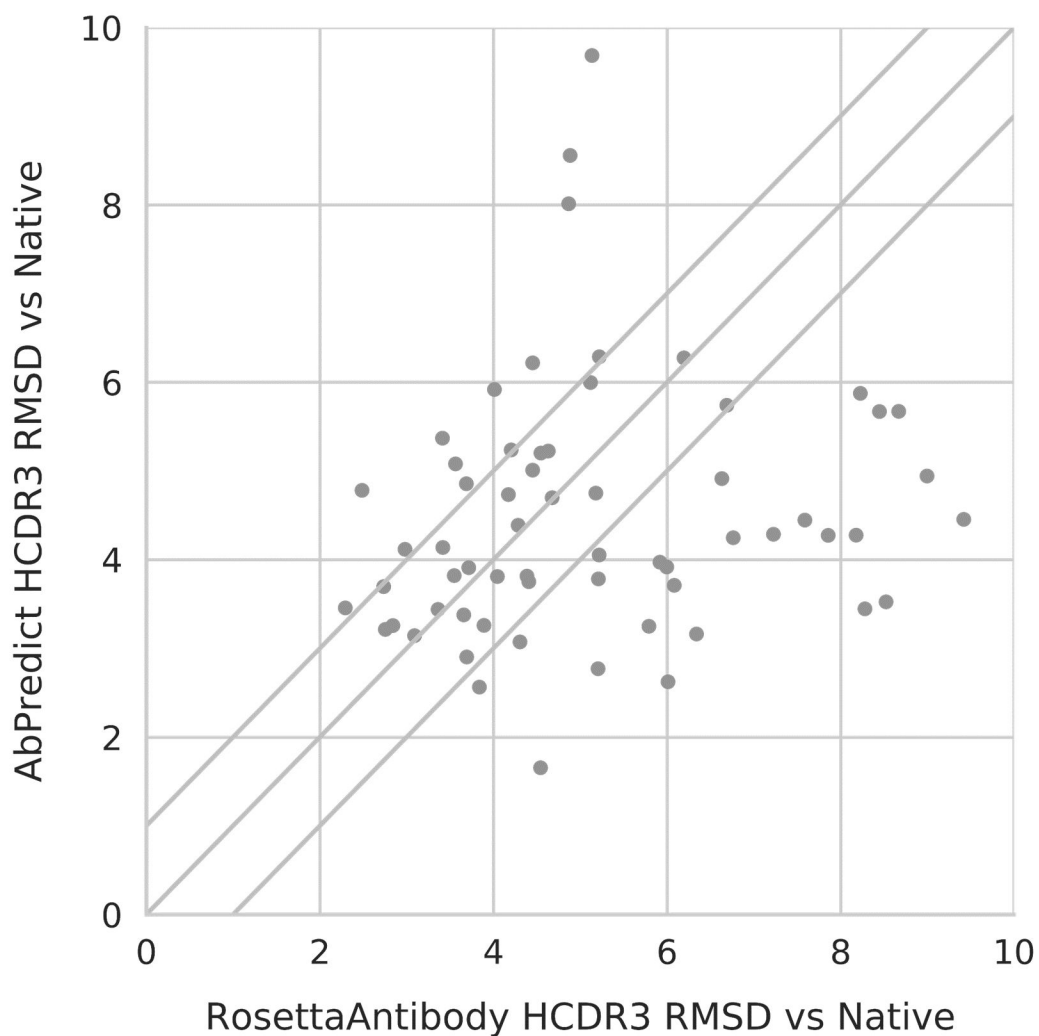

Figure S6: Comparison of antibody HCDR3 modeling performance for the beta models produced by AbPredict against RosettaAntibody. Each method's median RMSD was graphed against each other for each antibody. The plot has a line at  $y=x$  representing equal performance between methods. Points above the line represent cases where RosettaAntibody outperformed AbPredict, whereas points below the line represent the opposite case.

The following example commands have been executed to model the human IGM rheumatoid factor Fab and can be used for any other Fab.

### Homology Modeling of Human IGM Rheumatoid Factor Fab using RosettaCM

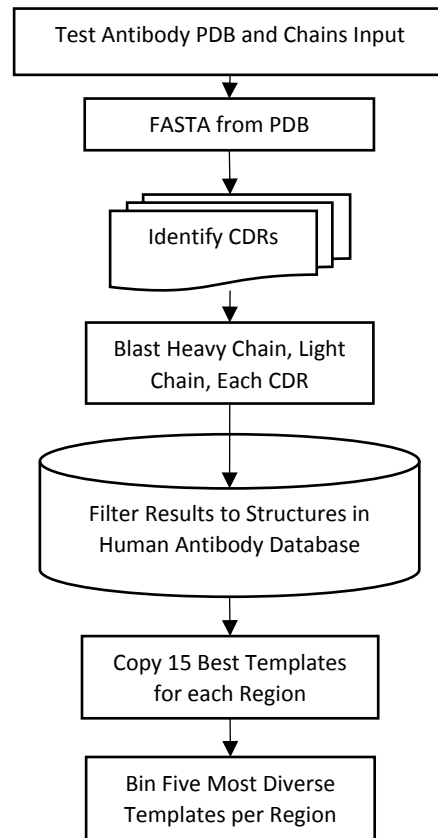

Figure S7: RosettaCM Template selection

#### Structure and input preparation

For all RosettaCM modeling, Rosetta-3.7 was used

Identification of CDRs:

```

def IdentifyCDRs(light_chain, heavy_chain):
    """ Determination of loops in both light and heavy chains

    light_chain -- string representation of light chain
    heavy_chain -- string representation of heavy chain
    """

    L1_pattern=r'C[A-Z]{1,17}(WYL|WLQ|WFQ|WYQ|WYH|WVQ|WVR|WWQ|WVK|WYR|WLL|WFL|WVF|WIQ|WYR|WNQ|WHL|WHQ|WYM|WYY)'
    L3_pattern=r'C[A-Z]{1,15}(L|F|V|S)G[A-Z](G|Y)'
  
```

```

H1_pattern=r'C[A-Z]{1,16}(W)(I|V|F|Y|A|M|L|N|G)(R|K|Q|V|N|C|G)(Q|K|H|E|L|R)' # Jeff's mod
for ATHM set
#H1_pattern=r'C[A-Z]{1,16}(W)(I|V|F|Y|A|M|L|N|G)(R|K|Q|V|N|C)(Q|K|H|E|L|R)'
H3_pattern=r'C[A-Z]{1,33}(W)(G|A|C)[A-Z]{1,2}(Q|S|G|R)'

''' Identify CDR region and return them as dict with keys: 'FR_H1', 'FR_H2', 'FR_H3', 'FR_H4',
'FR_L1', 'FR_L2', 'FR_L3', 'FR_L4', 'H1', 'H2', 'H3', 'L1', 'L2', 'L3'
'''
light_first = light_chain[:65] if len(light_chain) > 130 else light_chain[:60]
heavy_first = heavy_chain[:70] if len(heavy_chain) > 140 else heavy_chain[:60]
len_FR_L1=0
res = re.search(L1_pattern,light_first)
FR_L1 = L1 = False
if res:
    L1 = res.group()[1:-3]
    L1_start = light_chain.index(L1)
    L1_end = L1_start + len(L1) - 1
    print(("L1 detected: %s (%d residues at positions %d to %d)" % (L1, len(L1), L1_start,
L1_end)))
    FR_L1 = light_chain[:L1_start]
    if len(FR_L1) > 24:
        len_FR_L1 = len(FR_L1) - 24
        FR_L1 = light_chain[len_FR_L1:L1_start]
    else:
        print("L1 detected: False")

    light_second = light_chain[L1_end+16+7:L1_end+16+7+80] if len(light_chain) > 130 else
light_chain[L1_end+16+7:]

## L3
L3 = False
res = re.search(L3_pattern,light_second)
if res:
    L3 = res.group()[1:-4]
    L3_start = light_chain.index(L3)
    L3_end = L3_start + len(L3) - 1
    print(("L3 detected: %s ( %d residues at positions %d to %d)" % (L3, len(L3), L3_start,
L3_end)))
    else:
        print("L3 detected: False")
if L1 and L3:
    #L1_start = light_chain.index(L1)
    #L1_end = L1_start + len(L1) - 1

    L2_start = L1_end + 16
    L2_end = L2_start + 7 - 1

```

```

        L2 = light_chain[L2_start:L2_start+7] # L2 is identified here. Current implementation can
deal with only 7-residue L2
        print(("L2 detected: %s (%d residues at positions %d to %d)" % (L2, len(L2), L2_start,
L2_end)))

        #FR_L1 = light_chain[:L1_start]
        FR_L2 = light_chain[ L1_end + 1 : L1_end + 1 + 15
    ]
        FR_L3 = light_chain[ L2_end + 1 : L2_end + 1 + L3_start - L2_end - 1 ]
        FR_L4 = light_chain[ L3_end + 1 : L3_end + 1 + 12
    ]

        print(("FR_L1: ", FR_L1))
        print(("FR_L2: ", FR_L2))
        print(("FR_L3: ", FR_L3))
        print(("FR_L4: ", FR_L4))
        print(("L segments: ",FR_L1,L1,FR_L2,L2,FR_L3,L3,FR_L4))
# HH EE AA VV YY
## H1
res = re.search(H1_pattern, heavy_first)
H1 = False
len_FR_H1 = 0
if res:
    H1 = res.group()[4:-4]
    H1_start = heavy_chain.index(H1)
    H1_end = H1_start + len(H1) - 1
    print(("H1 detected: %s (%d residues at positions %d to %d)" % (H1, len(H1), H1_start,
H1_end)))
    FR_H1 = heavy_chain[:H1_start]
    if len(FR_H1) > 25:
        len_FR_H1 = len(FR_H1) - 25
        FR_H1 = heavy_chain[len_FR_H1:H1_start]
    else:
        print("H1 detected: False")

    heavy_second = heavy_chain[H1_end+33+15:H1_end+33+15+95+len_FR_H1] if
len(heavy_chain) > 140 else heavy_chain[H1_end+33+15:]

## H3
H3 = False #H3_and_stem=False
res = re.search(H3_pattern,heavy_second)
if res:
    H3 = res.group()[3:-4] #H3_and_stem = res.group()[0:-4]
    H3_start = heavy_chain.index(H3)
    H3_end = H3_start + len(H3) - 1
    print(("H3 detected: %s (%d residues at positions %d to %d)" % (H3, len(H3), H3_start,
H3_end)))

```

```

else:
    print("H3 detected: False")
if H1 and H3:
    #H1_start = heavy_chain.index(H1)
    #H1_end = H1_start + len(H1) - 1
    H2_start = H1_end + 15
    H2_end = H3_start - 33
    H2 = heavy_chain[H2_start:H2_start + H2_end-H2_start+1]
    print(("H2 detected: %s (%d residues at positions %d to %d)" % (H2, len(H2), H2_start,
H2_end)))
    #FR_H1 = heavy_chain[:H1_start]
    #if len(FR_H1) > 26:
    #    FR_H1 = light_chain[20:H1_start]
    FR_H2 = heavy_chain[H1_end + 1: H1_end + 1 + H2_start - H1_end - 1]
    FR_H3 = heavy_chain[H2_end + 1: H2_end + 1 + H3_start - H2_end - 1]
    FR_H4 = heavy_chain[H3_end + 1: H3_end + 1 + 12]
    print(("FR_H1: ", FR_H1))
    print(("FR_H2: ", FR_H2))
    print(("FR_H3: ", FR_H3))
    print(("FR_H4: ", FR_H4))
    print(("H segments: ",FR_H1,H1,FR_H2,H2,FR_H3,H3,FR_H4))
if not (L1 and L3 and H1 and H3):
    if not L1: print(('ERROR: CDR L1 cannot be recognized !!! L1 pattern: %s' %
L1_pattern))
#C[A-Z]{1,17}(WYL|WLQ|WFQ|WYQ|WYH|WVQ|WVR|WWQ|WVK|WYR|WLL|WFL|WVF|WIQ|W
YR|WNQ|WHL|WHQ|WYM|WYY)'
    if not L3: print(('ERROR: CDR L3 cannot be recognized !!! L3 pattern: %s' %
L3_pattern)) # C[A-Z]{1,15}(L|F|V|S)G[A-Z](GY)
    if not H1: print(('ERROR: CDR H1 cannot be recognized !!! H1 pattern: %s' %
H1_pattern)) # C[A-Z]{1,16}(W)(I|V|F|Y|A|M|L|N|G)(R|K|Q|V|N|C)(Q|K|H|E|L|R)
    if not H3: print(('ERROR: CDR H3 cannot be recognized !!! H3 pattern: %s' %
H3_pattern)) # C[A-Z]{1,33}(W)(G|A|C)[A-Z](Q|S|G|R)
    sys.exit(1)
    res = dict(L1=L1, L2=L2, L3=L3, H1=H1, H2=H2, H3=H3, FR_L1=FR_L1, FR_L2=FR_L2,
FR_L3=FR_L3, FR_L4=FR_L4, FR_H1=FR_H1, FR_H2=FR_H2, FR_H3=FR_H3, FR_H4=FR_H4)
    #if Options.verbose: print 'L1: %(L1)s\nL2: %(L2)s\nL3: %(L3)s\nH1: %(H1)s\nH2: %(H2)s\nH3:
%(H3)s' % res
    return res

```

Selection of template structures using Blast:

```

def Blast(folder, folderall, minscore, maxscore, threshold):
    os.system('mkdir ' + folder)
    if os.path.exists('./' + folder + '/results.html'): #Skip Blast if Blast results already exist
        pass
    else: #Submit fragment to Blast and download results
        Blasturl = urllib.request.Request('https://blast.ncbi.nlm.nih.gov/Blast.cgi?')

```

```

BlastFile = open('./' + folderall + '/' + folder + '.fasta', 'rb')
BlastuploadText = BlastFile.read()
BlastFile.close()
Blastdata = urllib.parse.urlencode({'QUERY': BlastuploadText, 'PROGRAM':
'blastp', 'DATABASE': 'pdb', 'MAX_NUM_SEQ': '5000', 'HITLIST_SIZE': '100', 'DESCRIPTIONS':
'5000', 'ALIGNMENTS': '100', 'SHORT_QUERY_ADJUST': 'on', 'CMD': 'Put'}).encode('utf-8')
BlastIDresults = urllib.request.urlopen(Blasturl, Blastdata)
with open('./' + folder + '/IDresults.html', 'wb') as f:
    f.write(BlastIDresults.read())
    f.close()
BlastResultsFile = open('./' + folder + '/IDresults.html', 'r')
HTMLresults = BlastResultsFile.read()
start = 0
if HTMLresults.find('<input name="RID" value=""', start) > 0:
    idx = HTMLresults.find('<input name="RID" value=""', start)
    closing_anchor = HTMLresults.find('"', idx+25)
    scoreID = HTMLresults[idx+25:closing_anchor]
time.sleep(10)
Blastdata = urllib.parse.urlencode({'CMD': 'Get', 'RID': scoreID, 'DESCRIPTIONS':
'5000',}).encode('utf-8')
Blastresults = urllib.request.urlopen(Blasturl, Blastdata)
with open('./' + folder + '/results.html', 'wb') as f:
    f.write(Blastresults.read())
    f.close()

with open('./' + folder + '/results.html', 'rb') as f:
    text = f.read().decode('utf-8')

start = 0
while text.find('Status=WAITING', start) > 0: #Check if Blast is finished
    print('Not Ready')
    time.sleep(10)
    f.close()
    Blastresults = urllib.request.urlopen(Blasturl, Blastdata)
    with open('./' + folder + '/results.html', 'wb') as f:
        f.write(Blastresults.read())
        f.close()
    with open('./' + folder + '/results.html', 'rb') as f:
        text = f.read().decode('utf-8')
    start = 0

start = 0
q = []
added = 0
while text.find('<td class="c1 l lim">', start) > 0: #Look through results file for list of PDBs and
score
    idx = text.find('<td class="c1 l lim">', start)

```

```

closing_anchor = text.find('</a>', idx)
title = text[closing_anchor-6:closing_anchor]
title = title.replace('_', '')
altidx = text.find('c7', idx - 65)
altclose = text.find('%', altidx)
score = int(float(text[altidx+4:altclose]))
dr = "
if title[0:4].lower() in antibody_list and title[0:4].lower != folderall[0:4].lower: # Filter by
database
    print(title[0:4].lower() )
    if folder == 'heavy' and len(score_list[title[0:4].lower()]) == 0:
        score_list[title[0:4].lower()].append(score)
    if folder == 'light' and len(score_list[title[0:4].lower()]) == 1:
        score_list[title[0:4].lower()].append(score)
    if minscore < score < maxscore and added < threshold: #Check if score is within
range and less than the threshold number of files have been downloaded
        with gzip.open('./templates/' + title[0:4].lower() + '.pdb.gz', 'rb') as f_in:
            with open('./' + folder + '/' + title[0:4].lower() + '.pdb', 'wb') as
f_out:
                shutil.copyfileobj(f_in, f_out)
                os.system('python pdb2fasta.py ' + './' + folder + '/' + title[0:4].lower() +
'.pdb > ' + './' + folder + '/' + title[0:4].lower() + '.fasta')
                print('python pdb2fasta.py ' + './' + folder + '/' + title[0:4].lower() + '.pdb >
' + './' + folder + '/' + title[0:4].lower() + '.fasta')
                time.sleep(0.05)
                added += 1
        start = idx + 40
        #Run clustering off of grouped files
        p = subprocess.Popen('clustalw.py ' + folder + ' ' + folderall, shell=True)
        q.append(p)
        exitcodes = [p.wait() for p in q]

```

Preparation of input structures using RosettaRelax:

```
../rosetta-3.7/main/source/bin/relax.default.linuxgccrelease -s 1aqk.pdb @relax.options -nstruct 1
```

RosettaRelax options:

```
-relax:fast
-default_max_cycles 200
-constrain_relax_to_start_coords true
-out:file:fullatom
-out:pdb_gz
```

Command used for partial thread:

```
../rosetta-3.7/main/source/bin/partial_thread.default.linuxgccrelease -in:file:fasta 1adq.fasta -
in:file:alignment 1adq_1aqk.grishin -in:file:template_pdb 1aqk.pdb
```

## Construction of Human IGM Rheumatoid Factor Fab using RosettaCM

Command used for RosettaCM:

```
#SBATCH --output=all_%a.out
#SBATCH --array=0-99%50
../rosetta-3.7/main/source/bin/rosetta_scripts.default.linuxgccrelease @rosetta_cm.options -nstruct 10 -
out.prefix ${SLURM_ARRAY_TASK_ID}_
```

RosettaCM Protocol:

```
<dock_design>
  <TASKOPERATIONS>
</TASKOPERATIONS>
  <SCOREFXNS>
    <stage1 weights=score3 symmetric=0>
      <Reweight scoretype=atom_pair_constraint weight=0.5/>
    </stage1>
    <stage2 weights=score4_smooth_cart symmetric=0>
      <Reweight scoretype=atom_pair_constraint weight=0.5/>
    </stage2>
    <fullatom weights=talaris2013_cart symmetric=0>
      <Reweight scoretype=atom_pair_constraint weight=0.5/>
    </fullatom>
  </SCOREFXNS>
  <FILTERS>
</FILTERS>
  <MOVERS>
    <Hybridize name=hybridize stage1_scorefxn=stage1 stage2_scorefxn=stage2 fa_scorefxn=fullatom
batch=1 stage1_increase_cycles=1.0 stage2_increase_cycles=1.0 linmin_only=1>
      <Template pdb="1aqk.pdb.pdb" cst_file="AUTO" weight= 0.6862745098039216 />
      <Template pdb="1dfb.pdb.pdb" cst_file="AUTO" weight= 0.6509803921568628 />
      <Template pdb="1mim.pdb.pdb" cst_file="AUTO" weight= 0.5294117647058824 />
      <Template pdb="1w72.pdb.pdb" cst_file="AUTO" weight= 0.8588235294117647 />
      <Template pdb="3ghe.pdb.pdb" cst_file="AUTO" weight= 0.6313725490196078 />
      <Template pdb="3giz.pdb.pdb" cst_file="AUTO" weight= 0.6862745098039216 />
      <Template pdb="3lmj.pdb.pdb" cst_file="AUTO" weight= 0.6078431372549019 />
      <Template pdb="3piq.pdb.pdb" cst_file="AUTO" weight= 0.7843137254901961 />
      <Template pdb="3ujj.pdb.pdb" cst_file="AUTO" weight= 0.615686274509804 />
      <Template pdb="3uls.pdb.pdb" cst_file="AUTO" weight= 0.6784313725490196 />
      <Template pdb="3wd5.pdb.pdb" cst_file="AUTO" weight= 0.6666666666666666 />
      <Template pdb="4fql.pdb.pdb" cst_file="AUTO" weight= 0.6588235294117647 />
      <Template pdb="4fqq.pdb.pdb" cst_file="AUTO" weight= 0.7137254901960784 />
      <Template pdb="4g5z.pdb.pdb" cst_file="AUTO" weight= 0.6431372549019608 />
      <Template pdb="4hf5.pdb.pdb" cst_file="AUTO" weight= 0.6588235294117647 />
      <Template pdb="4hk0.pdb.pdb" cst_file="AUTO" weight= 0.7294117647058823 />
      <Template pdb="4hpy.pdb.pdb" cst_file="AUTO" weight= 0.7843137254901961 />
      <Template pdb="4iml.pdb.pdb" cst_file="AUTO" weight= 0.7176470588235294 />
```



```

<Template pdb="4jzn.pdb.pdb" cst_file="AUTO" weight= 0.7294117647058823 />
<Template pdb="4m5y.pdb.pdb" cst_file="AUTO" weight= 0.7254901960784313 />
<Template pdb="4m6o.pdb.pdb" cst_file="AUTO" weight= 0.6705882352941176 />
<Template pdb="4npy.pdb.pdb" cst_file="AUTO" weight= 0.7019607843137254 />
<Template pdb="4qci.pdb.pdb" cst_file="AUTO" weight= 0.7686274509803922 />
<Template pdb="4v1d.pdb.pdb" cst_file="AUTO" weight= 0.6470588235294118 />
<Template pdb="4wuk.pdb.pdb" cst_file="AUTO" weight= 0.7294117647058823 />
<Template pdb="4yk4.pdb.pdb" cst_file="AUTO" weight= 0.5450980392156862 />
<Template pdb="5fgc.pdb.pdb" cst_file="AUTO" weight= 0.7411764705882353 />
<Template pdb="5j13.pdb.pdb" cst_file="AUTO" weight= 0.8156862745098039 />

```

```
</Hybridize>
```

```
<FastRelax name=relax scorefxn=fullatom/>
```

```
</MOVERS>
```

```
<APPLY_TO_POSE>
```

```
</APPLY_TO_POSE>
```

```
<PROTOCOLS>
```

```
<Add mover=hybridize/>
```

```
<Add mover=relax/>
```

```
</PROTOCOLS>
```

```
<OUTPUT scorefxn=talaris2014 />
```

```
</dock_design>
```

RosettaCM Options:

```

# i/o
-in:file:fasta 1adq.fasta
-parser:protocol rosetta_cm.xml
-out:pdb_gz

# relax options
-relax:constrain_relax_to_start_coords true
-default_max_cycles 500
-dualspace

# reduce memory footprint
-chemical:exclude_patches LowerDNA UpperDNA Cterm_amidation SpecialRotamer VirtualBB
ShoveBB VirtualDNAPhosphate VirtualNTerm CTermConnect sc_orbitals pro_hydroxylated_case1
pro_hydroxylated_case2 ser_phosphorylated thr_phosphorylated tyr_phosphorylated tyr_sulfated
lys_dimethylated lys_monomethylated lys_trimethylated lys_acetylated glu_carboxylated cys_acetylated
tyr_diiodinated N_acetylated C_methylamidated MethylatedProteinCterm

```

### RosettaRelax of Human IGM Rheumatoid Factor Fab

Command for RosettaRelax:

```

#SBATCH --output=allrelax_%a.out
#SBATCH --array=0-99%100

```

```

./rosetta-3.7/main/source/bin/relax.default.linuxgccrelease @relax.options -l
"${SLURM_ARRAY_TASK_ID}_score.txt" -out:prefix relax -nstruct 1

```

RosettaRelax Options:

```

-relax:fast
-default_max_cycles 200
-constrain_relax_to_start_coords true
-out:file:fullatom
-out:pdb_gz

```

## Homology Modeling of Human IGM Rheumatoid Factor Fab using RosettaAntibody

### Structure and Input Preparation

For all RosettaAntibody modeling, Rosetta 2019.06+release.4d8c807 was used

Command used for grafting:

```

../Rosetta_AB/main/source/bin/antibody.linuxgccrelease -fasta 1ADQ.fasta -antibody::grafting_database
../Rosetta_AB/tools/antibody/ -antibody::blastp /dors/meilerlab/apps/Linux2/x86_64/blast/2.7.1/bin/blastp
-antibody:n_multi_templates 1 -exclude_pdb 1ADQ -allow_omega_mismatches_for_north_clusters

```

### H3 Loop *de novo* Modeling

Command used for H3 loop modeling:

```

#SBATCH --output=PATHL_%a.out
#SBATCH --array=0-99
../Rosetta_AB/main/source/bin/antibody_H3.linuxgccrelease @abH3.flags -in:file:s ../grafting/model-
0.relaxed.pdb -nstruct 10 -antibody:auto_generate_kink_constraint -
antibody:all_atom_mode_kink_constraint -out:file:scorefile ../H3_modeling_scores.fasc -out:path:pdb
../H3_modeling/ -out:prefix ${SLURM_ARRAY_TASK_ID}_

```

RosettaAntibody Options:

```

#how to run antibody mode -- these are the current best-practices
-antibody::remodel      perturb_kic
-antibody::snugfit      true
-antibody::refine       refine_kic
-antibody::cter_insert  false
-antibody::flank_residue_min true
-antibody::bad_ater     false
-antibody::h3_filter    false
-antibody::h3_filter_tolerance 5
-antibody:constrain_vlvh_qq

#more standard settings, for packages used by antibody_H3
-ex1
-ex2
-extrachi_cutoff 0

```

```
#these are standard settings for kic/ngk
-loops:legacy_kic false
-loops:kic_min_after_repack true
-loops:kic_omega_sampling
-loops:allow_omega_move true   ### remove 'true' and loop:?:
-kic_bump_overlap_factor 0.36
-loops:ramp_fa_rep
-loops:ramp_rama
-loops:refine_outer_cycles 5

#These enable the kink constraints. Increase the weight if you want tighter kink constraints.
-antibody:constrain_cter
-constraints:cst_weight 1.0
```

### RosettaRelax of Human IGM Rheumatoid Factor Fab

Command for RosettaRelax:

```
#SBATCH --output=allrelax_%a.out
#SBATCH --array=0-99%100
../rosetta-3.7/main/source/bin/relax.default.linuxgccrelease @relax.options -l
"${SLURM_ARRAY_TASK_ID}_score.txt" -out:prefix relax -nstruct 1
```

RosettaRelax Options:

```
-relax:fast
-default_max_cycles 200
-constrain_relax_to_start_coords true
-out:file:fullatom
-out:pdb_gz
```

### Homology Modeling of Human IGM Rheumatoid Factor Fab using AbPredict

#### Structure and Input Preparation

For all AbPredict modeling, Rosetta-3.12 was used

Command used for template selection:

```
./create_run.sh 66 12 75 17
```

Command used for sequence preparation:

```
./prepare.sh 1ADQ.fasta
```

#### Construction of Human IGM Rheumatoid Factor Fab using AbPredict

Command used for AbPredict:

```
#SBATCH --output=1ADQ_HL_%a.out
#SBATCH --array=0-99
```

```

filename='segment_lengths_script_vars'
line_no=$(cat ${filename} | wc -l)
line_no=$((line_no-1))
line_no=$((line_no/40))
nstruct=$((1000/${line_no}))

array_index=$((SLURM_ARRAY_TASK_ID/4))

readarray -t myarray < ${filename}

/dors/meilerlab/apps/rosetta/rosetta-3.12/main/source/bin/rosetta_scripts.default.linuxgccrelease @flags -
database /dors/meilerlab/apps/rosetta/rosetta-3.12/main/database/ -nstruct ${nstruct} -out:prefix
${SLURM_ARRAY_TASK_ID}_ ${myarray[${array_index}]}
sequence=YVLTQPPSVSVAPGQTARITCGGNNIGKSVHWYQQKPGQAPVLLVYDDSDRPPGIPER
FSGSNSGNTATLTISRVEAGDEADYICQVWSSSDHAVFGGGTKLTVQLVESGGGLVQPGRSLR
LSCVTSGFTFDDYAMHWVRQSPGKGLEWVSGISWNTGTIIYADSVGRFIISRDNKNSLYLQMN
SLRVEDTALYYCAKTRSYVVAEEYFHYWGQILVTVS

```

#### AbPredict Templates:

```

-parser:script_vars entry_H1_H2=2HRPN entry_L1_L2=3G6JG entry_H3=4ODSH entry_L3=3U2SB
-parser:script_vars entry_H1_H2=5BVJH entry_L1_L2=3ESVG entry_H3=5DSCA entry_L3=3MUGE
-parser:script_vars entry_H1_H2=4HG4T entry_L1_L2=1FNSL entry_H3=3QCUI entry_L3=4UTAL
-parser:script_vars entry_H1_H2=4QEXH entry_L1_L2=1B4JL entry_H3=3RHWI entry_L3=4ODWL
-parser:script_vars entry_H1_H2=3FMGH entry_L1_L2=4OIIL entry_H3=4JPWH entry_L3=4F58N
-parser:script_vars entry_H1_H2=2DBLH entry_L1_L2=3QPQL entry_H3=3RI5H entry_L3=4NKIL
-parser:script_vars entry_H1_H2=2OTUD entry_L1_L2=4DKFL entry_H3=4TNWU entry_L3=5C9KB
-parser:script_vars entry_H1_H2=4RRPJ entry_L1_L2=4MA7L entry_H3=3RHWI entry_L3=4QHNB
-parser:script_vars entry_H1_H2=2FR4H entry_L1_L2=4XWOP entry_H3=5F9WB entry_L3=4AIXC
-parser:script_vars entry_H1_H2=3ZE1H entry_L1_L2=1YY9C entry_H3=1IBGH entry_L3=5ACOL
-parser:script_vars entry_H1_H2=4GXUQ entry_L1_L2=3CFEA entry_H3=4UIKH entry_L3=4TRPL
-parser:script_vars entry_H1_H2=4TNVH entry_L1_L2=2BDNL entry_H3=1IBGH entry_L3=1MCKB
-parser:script_vars entry_H1_H2=4OQTH entry_L1_L2=1FGVL entry_H3=4QTHH entry_L3=3MLYM
-parser:script_vars entry_H1_H2=4OCWH entry_L1_L2=1L7IL entry_H3=4EDWH entry_L3=3EYFC
-parser:script_vars entry_H1_H2=3CFEH entry_L1_L2=1RIHL entry_H3=4UINH entry_L3=3B5GA
-parser:script_vars entry_H1_H2=3MLSH entry_L1_L2=3UBXL entry_H3=4TNWF entry_L3=4QHLLB
-parser:script_vars entry_H1_H2=5ANMH entry_L1_L2=3BGFL entry_H3=3MCKB entry_L3=4UNUB
-parser:script_vars entry_H1_H2=2EXYE entry_L1_L2=2XRAL entry_H3=3Q3GB entry_L3=4DQOL
-parser:script_vars entry_H1_H2=15C8H entry_L1_L2=1QP1B entry_H3=4KZDH entry_L3=1MCFB
-parser:script_vars entry_H1_H2=4WFEE entry_L1_L2=2BX5O entry_H3=4ODVH entry_L3=3G6AA
-parser:script_vars entry_H1_H2=2VXSH entry_L1_L2=1E4WL entry_H3=3W9DA entry_L3=3MLYL
-parser:script_vars entry_H1_H2=3MLSJ entry_L1_L2=2DQHL entry_H3=4QTHA entry_L3=4XWGL
-parser:script_vars entry_H1_H2=3HMXH entry_L1_L2=4ODUL entry_H3=5DSCH entry_L3=4TRPL
-parser:script_vars entry_H1_H2=1HEZB entry_L1_L2=4D9RD entry_H3=3TNMA entry_L3=4F58O
-parser:script_vars entry_H1_H2=4F9LC entry_L1_L2=2DQFD entry_H3=5DQJA entry_L3=4YC2L
-parser:script_vars entry_H1_H2=3DETC entry_L1_L2=4GW1A entry_H3=3G6AB entry_L3=4JAMB

```

```
-parser:script_vars entry_H1_H2=4H0GA entry_L1_L2=3HMXL entry_H3=4YBLB entry_L3=3V6FL
-parser:script_vars entry_H1_H2=4XWOQ entry_L1_L2=1YY8A entry_H3=4TNVH entry_L3=1AQKL
-parser:script_vars entry_H1_H2=2HT3C entry_L1_L2=1FL5L entry_H3=5DUBH entry_L3=3U2SL
-parser:script_vars entry_H1_H2=4GMTH entry_L1_L2=3EYFC entry_H3=4TNVH entry_L3=3V6FB
-parser:script_vars entry_H1_H2=4RDQO entry_L1_L2=3IY0L entry_H3=3CX5J entry_L3=4TRPL
-parser:script_vars entry_H1_H2=3ZE0H entry_L1_L2=1BWWB entry_H3=2NTFH entry_L3=3MLYL
-parser:script_vars entry_H1_H2=4YO0A entry_L1_L2=1RZ7L entry_H3=3IFPE entry_L3=5C9KG
-parser:script_vars entry_H1_H2=3FKUX entry_L1_L2=4GMSN entry_H3=3SDYH entry_L3=4TUOB
-parser:script_vars entry_H1_H2=5CIPA entry_L1_L2=2ITDB entry_H3=1P84J entry_L3=4TUKL
-parser:script_vars entry_H1_H2=4F9LC entry_L1_L2=1BWWA entry_H3=4QHKO entry_L3=4K9EL
-parser:script_vars entry_H1_H2=2ZJSH entry_L1_L2=4CMHC entry_H3=2IPTH entry_L3=2MCG1
-parser:script_vars entry_H1_H2=4R96B entry_L1_L2=1J5OL entry_H3=4TNVH entry_L3=4HH9C
-parser:script_vars entry_H1_H2=5CSZA entry_L1_L2=3HI6L entry_H3=4PB9H entry_L3=5E8EA
-parser:script_vars entry_H1_H2=2VDRH entry_L1_L2=3S36L entry_H3=5DQJA entry_L3=2FL5C
```

AbPredict Options:

```
-nodelay
-use_input_sc
-ignore_unrecognized_res
-overwrite
-out:file:fullatom
-s 2BRR.ppk_ideal.pdb
-parser:protocol AbPredict_xsd.xml
-parser:script_vars template_pdb=2BRR.ppk_ideal.pdb
-pdb_comments true

-parser:script_vars          H1_H2.db=../AB_db_files/H1_H2.db          H3.db=../AB_db_files/H3.db
L3.db=../AB_db_files/L3.db L1_L2.db=../AB_db_files/L1_L2.db
```

### RosettaRelax of Human IGM Rheumatoid Factor Fab

Command for RosettaRelax:

```
#SBATCH --output=PATHL_%a.out
#SBATCH --array=0-99
#exclude=bf21,bf22,bf23,bf24
/dors/meilerlab/apps/rosetta/rosetta-3.7/main/source/bin/relax.default.linuxgccrelease @./relax.options -
in:file:s ${SLURM_ARRAY_TASK_ID}_2BRR.ppk_ideal_0001.pdb -out:prefix relax -nstruct 1
```

RosettaRelax Options:

```
-relax:fast
-default_max_cycles 200
-constrain_relax_to_start_coords true
-out:file:fullatom
-out:pdb_gz
```

### Data Analysis

**Calculation of RMSD to native structure**

```
pymol.cmd.load(path + '/' + folder + '/native.pdb.gz', 'Native')
pymol.cmd.do('run findseq.py')
#rmsd = get_RMSD('Test', rootx + '/' + pdbFile + '.pdb.gz', folder, path + '/' + folder + '/temp.pdb.gz',
CDRs['heavy'], CDRs['light'])
alignrmsd = pymol.cmd.align('Test', 'Native', cycles=5)[0]
superrmsd = pymol.cmd.super('Test & backbone', 'Native & backbone', cycles=0)[0]

pymol.cmd.do('findseq ' + CDRs['H1'] + ', Native, NativeH1')
pymol.cmd.do('findseq ' + CDRs['H1'] + ', Test, TestH1')
pymol.cmd.do('alter NativeH1, chain="H"')
pymol.cmd.do('alter TestH1, chain="H"')
pymol.cmd.do('alter TestH1 & chain H, resi=str(1)')
pymol.cmd.do('alter NativeH1 & chain H, resi=str(1)')
H1RMS = pymol.cmd.rms_cur('TestH1 & backbone', 'NativeH1 & backbone')
```
